# Supplementary material for: Phase Transfer Catalysts Shift the Pathway to Transmetalation in Biphasic Suzuki-Miyaura Cross-Couplings
Source: Research Square preprint supplement (doi:10.21203/rs.3.rs-3118939/v1), 2023-09-18
Supplement: Supplementary file 1 [file f3f2fdcbb7d274fa412684d1.xlsx]

## Sheet: calibration curve
		Benzyl chloride calibration curve										Benzyl iodide calibration curve										BPin calibration curve										Benzyl bromide calibration curve
		Benzyl chloride	Average	mass (BNCl)-mg	mass (TMB)-mg	C (BNCl)	C (TMB)	X C(BNCl)/(TMB)	Y A(BNCl)/A(TMB)			Benzyl chloride	Average	mass (BNl)-mg	mass (TMB)-mg	C (BNl)	C (TMB)	X C(BNCl)/(TMB)	Y A(BNCl)/A(TMB)			BPin	Average	mass (BPin)-mg	mass (TMB)-mg	C (BPin)	C (TMB)	X C(BPin)/(TMB)	Y A(BPin)/A(TMB)			Benzyl bromide	Average	mass (Benzyl bromide)-mg	mass (TMB)-mg	C (Benzyl bromide)	C (TMB)	X C(Benzyl bromide\)/(TMB)	Y A(Benzyl bromide)/A(TMB)
	1st addition	0.242826									1st addition	0.794516									1st addition	0.838824									1st addition	0.923758
		0.245869										0.788662	0.789924	109	84	0.05	0.0499435	1.00113	0.789924			0.839996	0.837077	60.2	84	0.0257155	0.0499435	0.514892	0.837077			0.938719	0.934467	83.3	84	0.0487	0.0499435	0.975102	0.934467
		0.246393										0.786594										0.836833										0.9325
		0.246092	0.246082	44	84	0.03476	0.0499435	0.695986	0.246082		2nd adition	2.1616										0.832654										0.94289
		0.248363										2.1994	2.1829	218	84	0.1	0.0499435	2.00226	2.1829		2nd adition	1.65998									2nd adition	1.86714
		0.246775										2.1877										1.66191	1.65839	120.3	84	0.0513883	0.0499435	1.02893	1.65839			1.86797	1.86411	158.5	84	0.092666	0.0499435	1.85542	1.86411
		0.246503									3rd addition	3.18031										1.65327										1.85721
		0.245837										3.21822	3.19966	327.1	84	0.15	0.0499435	3.00339	3.19966		3rd addition	2.46211									3rd addition	2.89021
	2nd adition	0.514792										3.20045										2.46128	2.46238	178.3	84	0.076164	0.0499435	1.525	2.46238			2.88177	2.88239	241.7	84	0.14131	0.0499435	2.82939	2.88239
		0.513725																				2.46374										2.87521
		0.517229	0.516269	88	84	0.06952	0.0499435	1.39197	0.516269
		0.516169
		0.514252
		0.521447
	3rd addition	0.780097
		0.781661
		0.780103	0.780425	132	84	0.10428	0.0499435	2.08796	0.780425
		0.781069
		0.779195
		Product calibration curve										Boronic acid calibration curve
		Product	Average	mass (product)-mg	mass (TMB)-mg	C (Product)	C (TMB)	X C(Product)/(TMB)	Y A(Product)/A(TMB)			Boronic acid	Average	mass (boronic acid)-mg	mass (TMB)-mg	C (boronic acid)	C (TMB)	X C(Boronic acid)/(TMB)	Y A(Boronic acid)/A(TMB)
	1st addition	0.941327									1st addition	0.886954
		0.943843	0.940166	52.5	84	0.02648	0.0499435	0.530199	0.940166			0.882491	0.88903	38	84	0.025	0.0499435	0.500566	0.88903
		0.93703										0.889869
		0.938466										0.896807
	2nd adition	1.93134									2nd adition	1.76865
		1.93075	1.93075	106.7	84	0.0538178	0.0499435	1.07757	1.93075			1.78446	1.7757	76	84	0.05	0.0499435	1.00113	1.7757
		1.93016										1.774
	3rd addition	2.90843									3rd addition
		2.90591	2.90905	160	84	0.0807017	0.0499435	1.61586	2.90905									0	0
		2.9128

## Sheet: reproducibility
						Reproducibility of standard reaction conditions
	iCLC Raw Data (peak area)											Concentration
	157-5				157-6						157-5				157-6
time	Phenyl BPin	benzyl bromide	Product		BPin	Benzyl bromide	product			time	Phenyl BPin	benzyl bromide	Product		BPin	Benzyl bromide	product
0	2.22938	2.18604	0.0144489		2.31253	2.18741	0.0664559			0	0.0690703	0.108251	0.00100769		0.071654	0.108316	0.00244158
0.25	1.60232	1.8	0.720373		1.52713	1.73676	0.777134			0.25	0.0495842	0.0898754	0.0204707		0.0472476	0.0868649	0.0220357
0.5	1.17086	1.43046	1.13871		1.09688	1.38567	1.18311			0.5	0.0361765	0.0722847	0.0320047		0.0338776	0.0701528	0.0332288
0.75	0.900086	1.26267	1.41415		0.818422	1.18619	1.46261			0.75	0.0277622	0.0642978	0.0395988		0.0252244	0.0606576	0.0409349
1	0.712068	1.09321	1.61127		0.615613	1.04027	1.65435			1	0.0219194	0.0562317	0.0450337		0.0189221	0.0537114	0.0462213
1.25	0.543095	0.997409	1.74101		0.471887	0.931188	1.80244			1.25	0.0166686	0.0516712	0.0486107		0.0144558	0.048519	0.0503044
1.5	0.43191	0.903344	1.82666		0.362058	0.844892	1.90457			1.5	0.0132135	0.0471937	0.0509721		0.0110428	0.0444113	0.0531203
1.75	0.331284	0.815728	1.9443		0.280703	0.784992	1.98092			1.75	0.0100865	0.043023	0.0542157		0.0085147	0.04156	0.0552253
2	0.259933	0.781108	1.98231		0.222106	0.738043	2.04519			2	0.00786926	0.0413751	0.0552637		0.00669379	0.0393252	0.0569974
2.25	0.202135	0.730222	2.02158		0.173803	0.695339	2.07019			2.25	0.00607319	0.0389529	0.0563463		0.00519277	0.0372924	0.0576865
2.5	0.162593	0.707951	2.08146		0.139897	0.666544	2.1095			2.5	0.0048444	0.0378927	0.0579972		0.00413913	0.0359217	0.0587705
2.75	0.131363	0.65566	2.07297		0.117672	0.645375	2.14878			2.75	0.00387393	0.0354036	0.0577631		0.00344848	0.0349141	0.0598534
3	0.110358	0.648705	2.14503		0.100199	0.625352	2.14774			3	0.00322119	0.0350726	0.05975		0.00290549	0.033961	0.0598248
3.25	0.0948561	0.617591	2.12391		0.0881875	0.61433	2.16545			3.25	0.00273947	0.0335916	0.0591677		0.00253224	0.0334363	0.0603129
3.5	0.081828	0.619272	2.15096		0.0785627	0.599333	2.1674			3.5	0.00233462	0.0336715	0.0599135		0.00223315	0.0327225	0.0603668
3.75	0.0728072	0.613852	2.15812		0.0698315	0.589897	2.17336			3.75	0.00205429	0.0334136	0.0601107		0.00196182	0.0322733	0.0605311
4	0.0659466	0.602209	2.13423							4	0.0018411	0.0328593	0.0594521
4.25	0.0619136	0.586229	2.18702							4.25	0.00171577	0.0320987	0.0609076
4.5	0.0586781	0.58231	2.17585							4.5	0.00161523	0.0319121	0.0605998
4.75	0.0577268	0.573671	2.18003							4.75	0.00158567	0.0315009	0.060715
5.25	0.0568542	0.573287	2.17346							5.25	0.00155855	0.0314826	0.0605339
5.75	0.0559766	0.546385	2.17718							5.75	0.00153128	0.030202	0.0606364
6.25	0.0544229	0.527881	2.17317							6.25	0.001483	0.0293212	0.0605259
6.75	0.0565112	0.522669	2.20953							6.75	0.00154789	0.0290732	0.0615284
7.25	0.0576118	0.513425	2.21936							7.25	0.0015821	0.0286332	0.0617994

## Sheet: Different excess in Benzylbromi
							Different excess in Benzylbromide
	iCLC Raw Data (peak area)											Concentration
	std (0.1M)				Reduced Benzyl bromide (0.05M)						std				Reduced Benzyl bromide (0.05M)				Increased Benzyl bromide (0.15M)				std-2
time	Phenyl BPin	benzyl bromide	Product		BPin	Benzyl bromide	product			time	Phenyl BPin	benzyl bromide	Product		BPin	Benzyl bromide	product		BPin	Benzyl bromide	product		BPin	Benzyl bromide	product
0	2.22938	2.18604	0.0144489		2.22767	1.00031	0.0592615			0	0.0690703	0.108251	0.00100769		0.0690171	0.0518091	0.00224322		0.0681884	0.158287	0.00208369		0.071654	0.108316	0.00244158
0.25	1.60232	1.8	0.720373		1.63526	0.682904	0.696212			0.25	0.0495842	0.0898754	0.0204707		0.0506077	0.0367005	0.0198046		0.0503404	0.138583	0.0171478		0.0472476	0.0868649	0.0220357
0.5	1.17086	1.43046	1.13871		1.29957	0.437718	1.08855			0.5	0.0361765	0.0722847	0.0320047		0.0401761	0.0250294	0.0306216		0.0383168	0.126537	0.0272746		0.0338776	0.0701528	0.0332288
0.75	0.900086	1.26267	1.41415		0.920344	0.269895	1.36888			0.75	0.0277622	0.0642978	0.0395988		0.0283917	0.0170409	0.0383507		0.0304919	0.117134	0.0344992		0.0252244	0.0606576	0.0409349
1	0.712068	1.09321	1.61127		0.708001	0.0943441	1.54354			1	0.0219194	0.0562317	0.0450337		0.0217931	0.00868451	0.0431661		0.0238897	0.109602	0.0397496		0.0189221	0.0537114	0.0462213
1.25	0.543095	0.997409	1.74101		0.658139	0.00314081	1.60167			1.25	0.0166686	0.0516712	0.0486107		0.0202436	0.00434315	0.0447689		0.0192518	0.103069	0.0441767		0.0144558	0.048519	0.0503044
1.5	0.43191	0.903344	1.82666		0.612597	0.00640398	1.62055			1.5	0.0132135	0.0471937	0.0509721		0.0188284	0.00449848	0.0452894		0.0150474	0.0986444	0.0477636		0.0110428	0.0444113	0.0531203
1.75	0.331284	0.815728	1.9443		0.560307	0.00571969	1.63468			1.75	0.0100865	0.043023	0.0542157		0.0172034	0.0044659	0.0456792		0.0118501	0.094664	0.0505503		0.0085147	0.04156	0.0552253
2	0.259933	0.781108	1.98231							2	0.00786926	0.0413751	0.0552637						0.00909553	0.0907193	0.0528774		0.00669379	0.0393252	0.0569974
2.25	0.202135	0.730222	2.02158							2.25	0.00607319	0.0389529	0.0563463						0.00707389	0.0880771	0.0543343		0.00519277	0.0372924	0.0576865
2.5	0.162593	0.707951	2.08146							2.5	0.0048444	0.0378927	0.0579972						0.00496455	0.0851441	0.0559915		0.00413913	0.0359217	0.0587705
2.75	0.131363	0.65566	2.07297							2.75	0.00387393	0.0354036	0.0577631						0.00333027	0.0832001	0.0573116		0.00344848	0.0349141	0.0598534
3	0.110358	0.648705	2.14503							3	0.00322119	0.0350726	0.05975						0.00215407	0.0811175	0.0582586		0.00290549	0.033961	0.0598248
3.25	0.0948561	0.617591	2.12391							3.25	0.00273947	0.0335916	0.0591677						0.00149833	0.0803102	0.0588307		0.00253224	0.0334363	0.0603129
3.5	0.081828	0.619272	2.15096							3.5	0.00233462	0.0336715	0.0599135						0.00129992	0.0792627	0.0587357		0.00223315	0.0327225	0.0603668
3.75	0.0728072	0.613852	2.15812							3.75	0.00205429	0.0334136	0.0601107						0.00126639	0.0782987	0.0589451		0.00196182	0.0322733	0.0605311
4	0.0659466	0.602209	2.13423							4	0.0018411	0.0328593	0.0594521						0.00123026	0.0772133	0.0589451
4.25	0.0619136	0.586229	2.18702							4.25	0.00171577	0.0320987	0.0609076
4.5	0.0586781	0.58231	2.17585							4.5	0.00161523	0.0319121	0.0605998
4.75	0.0577268	0.573671	2.18003							4.75	0.00158567	0.0315009	0.060715
5.25	0.0568542	0.573287	2.17346							5.25	0.00155855	0.0314826	0.0605339
5.75	0.0559766	0.546385	2.17718							5.75	0.00153128	0.030202	0.0606364
6.25	0.0544229	0.527881	2.17317							6.25	0.001483	0.0293212	0.0605259
6.75	0.0565112	0.522669	2.20953							6.75	0.00154789	0.0290732	0.0615284
7.25	0.0576118	0.513425	2.21936							7.25	0.0015821	0.0286332	0.0617994
				Std Conditions						VTNA						Reduced Benzyl bromide (0.05M)						VTNA
				Time	Bpin	Bromide	Product		[BPin] Adj	Norm Time BP	[Bromide]	Norm Time Bromide	[Pdt]	Norm Time Pdt		Time	Bpin	Bromide	Pdt		[BPin] Adj	Norm Time Bpin	[Bromide]	[Bromide] Adj	Norm Time Bromide	[Pdt]
				0	0.0690703	0.108251	0.00100769		0.0690703	0	0.108251	0	0.00100769	0		0	0.0690171	0.0570452	0.00224322		0.0690171	0	0.108251	0.161475	0	0.00224322
				0.25	0.0495842	0.0898754	0.0204707		0.0495842	0.25	0.0898754	0.25	0.0204707	0.25		0.25	0.0506077	0.0367005	0.0198046		0.0506077	0.25	0.0879063	0.14113	0.25	0.0198046
				0.5	0.0361765	0.0722847	0.0320047		0.0361765	0.5	0.0722847	0.5	0.0320047	0.5		0.5	0.0401761	0.0250294	0.0306216		0.0401761	0.5	0.0762352	0.129459	0.5	0.0306216
ORDER IN BENZYL BROMIDE		0		0.75	0.0277622	0.0642978	0.0395988		0.0277622	0.75	0.0642978	0.75	0.0395988	0.75		0.75	0.0283917	0.0170409	0.0383507		0.0283917	0.75	0.0682467	0.12147	0.75	0.0383507
				1	0.0219194	0.0562317	0.0450337		0.0219194	1	0.0562317	1	0.0450337	1		1	0.0217931	0.00868451	0.0431661		0.0217931	1	0.0598903	0.113114	1	0.0431661
				1.25	0.0166686	0.0516712	0.0486107		0.0166686	1.25	0.0516712	1.25	0.0486107	1.25		1.25	0.0202436	0.00434315	0.0447689		0.0202436	1.25	0.055549	0.108773	1.25	0.0447689
				1.5	0.0132135	0.0471937	0.0509721		0.0132135	1.5	0.0471937	1.5	0.0509721	1.5		1.5	0.0188284	0.00449848	0.0452894		0.0188284	1.5	0.0557043	0.108928	1.5	0.0452894
				1.75	0.0100865	0.043023	0.0542157		0.0100865	1.75	0.043023	1.75	0.0542157	1.75		1.75	0.0172034	0.0044659	0.0456792		0.0172034	1.75	0.0556717	0.108895	1.75	0.0456792
				2	0.00786926	0.0413751	0.0552637		0.00786926	2	0.0413751	2	0.0552637	2		2
				2.25	0.00607319	0.0389529	0.0563463		0.00607319	2.25	0.0389529	2.25	0.0563463	2.25		2.25
				2.5	0.0048444	0.0378927	0.0579972		0.0048444	2.5	0.0378927	2.5	0.0579972	2.5		2.5
				2.75	0.00387393	0.0354036	0.0577631		0.00387393	2.75	0.0354036	2.75	0.0577631	2.75		2.75
				3	0.00322119	0.0350726	0.05975		0.00322119	3	0.0350726	3	0.05975	3		3
				3.25	0.00273947	0.0335916	0.0591677		0.00273947	3.25	0.0335916	3.25	0.0591677	3.25		3.25
				3.5	0.00233462	0.0336715	0.0599135		0.00233462	3.5	0.0336715	3.5	0.0599135	3.5		3.5
				3.75	0.00205429	0.0334136	0.0601107		0.00205429	3.75	0.0334136	3.75	0.0601107	3.75		3.75
				4	0.0018411	0.0328593	0.0594521		0.0018411	4	0.0328593	4	0.0594521	4		4
				4.25	0.00171577	0.0320987	0.0609076		0.00171577	4.25	0.0320987	4.25	0.0609076	4.25		4.25
				4.5	0.00161523	0.0319121	0.0605998		0.00161523	4.5	0.0319121	4.5	0.0605998	4.5		4.5
				4.75	0.00158567	0.0315009	0.060715		0.00158567	4.75	0.0315009	4.75	0.060715	4.75		4.75
				5.25	0.00155855	0.0314826	0.0605339		0.00155855	5.25	0.0314826	5.25	0.0605339	5.25		5.25
				5.75	0.00153128	0.030202	0.0606364		0.00153128	5.75	0.030202	5.75	0.0606364	5.75		5.75
				6.25	0.001483	0.0293212	0.0605259		0.001483	6.25	0.0293212	6.25	0.0605259	6.25		6.25
				6.75	0.00154789	0.0290732	0.0615284		0.00154789	6.75	0.0290732	6.75	0.0615284	6.75		6.75
				7.25	0.0015821	0.0286332	0.0617994		0.0015821	7.25	0.0286332	7.25	0.0617994	7.25		7.25
	iCLC Raw Data (peak area)											Concentration
	std (0.1M)				Increased Benzyl bromide (0.15M)						std				Increased Benzyl bromide (0.015M)
time	Phenyl BPin	benzyl bromide	Product		BPin	Benzyl bromide	product			time	Phenyl BPin	benzyl bromide	Product		BPin	Benzyl bromide	product
0	2.22938	2.18604	0.0144489		2.201	3.2372	0.0534753			0	0.0690703	0.108251	0.00100769		0.0681884	0.158287	0.00208369
0.25	1.60232	1.8	0.720373		1.62665	2.82325	0.599851			0.25	0.0495842	0.0898754	0.0204707		0.0503404	0.138583	0.0171478
0.5	1.17086	1.43046	1.13871		1.23974	2.57019	0.967149			0.5	0.0361765	0.0722847	0.0320047		0.0383168	0.126537	0.0272746
0.75	0.900086	1.26267	1.41415		0.987928	2.37265	1.22918			0.75	0.0277622	0.0642978	0.0395988		0.0304919	0.117134	0.0344992
1	0.712068	1.09321	1.61127		0.77547	2.21442	1.41962			1	0.0219194	0.0562317	0.0450337		0.0238897	0.109602	0.0397496
1.25	0.543095	0.997409	1.74101		0.626222	2.07718	1.58019			1.25	0.0166686	0.0516712	0.0486107		0.0192518	0.103069	0.0441767
1.5	0.43191	0.903344	1.82666		0.490926	1.98422	1.71029			1.5	0.0132135	0.0471937	0.0509721		0.0150474	0.0986444	0.0477636
1.75	0.331284	0.815728	1.9443		0.388035	1.9006	1.81136			1.75	0.0100865	0.043023	0.0542157		0.0118501	0.094664	0.0505503
2	0.259933	0.781108	1.98231		0.299394	1.81773	1.89576			2	0.00786926	0.0413751	0.0552637		0.00909553	0.0907193	0.0528774
2.25	0.202135	0.730222	2.02158		0.234338	1.76222	1.9486			2.25	0.00607319	0.0389529	0.0563463		0.00707389	0.0880771	0.0543343
2.5	0.162593	0.707951	2.08146		0.166459	1.70061	2.00871			2.5	0.0048444	0.0378927	0.0579972		0.00496455	0.0851441	0.0559915
2.75	0.131363	0.65566	2.07297		0.113868	1.65977	2.05659			2.75	0.00387393	0.0354036	0.0577631		0.00333027	0.0832001	0.0573116
3	0.110358	0.648705	2.14503		0.0760178	1.61602	2.09094			3	0.00322119	0.0350726	0.05975		0.00215407	0.0811175	0.0582586
3.25	0.0948561	0.617591	2.12391		0.0549162	1.59906	2.11169			3.25	0.00273947	0.0335916	0.0591677		0.00149833	0.0803102	0.0588307
3.5	0.081828	0.619272	2.15096		0.0485313	1.57705	2.10824			3.5	0.00233462	0.0336715	0.0599135		0.00129992	0.0792627	0.0587357
3.75	0.0728072	0.613852	2.15812		0.0474525	1.5568	2.11584			3.75	0.00205429	0.0334136	0.0601107		0.00126639	0.0782987	0.0589451
4	0.0659466	0.602209	2.13423		0.0462898	1.534	2.11584			4	0.0018411	0.0328593	0.0594521		0.00123026	0.0772133	0.0589451
4.25	0.0619136	0.586229	2.18702							4.25	0.00171577	0.0320987	0.0609076
4.5	0.0586781	0.58231	2.17585							4.5	0.00161523	0.0319121	0.0605998
4.75	0.0577268	0.573671	2.18003							4.75	0.00158567	0.0315009	0.060715
5.25	0.0568542	0.573287	2.17346							5.25	0.00155855	0.0314826	0.0605339
5.75	0.0559766	0.546385	2.17718							5.75	0.00153128	0.030202	0.0606364
6.25	0.0544229	0.527881	2.17317							6.25	0.001483	0.0293212	0.0605259
6.75	0.0565112	0.522669	2.20953							6.75	0.00154789	0.0290732	0.0615284
7.25	0.0576118	0.513425	2.21936							7.25	0.0015821	0.0286332	0.0617994
				Std Conditions						VTNA						Increased Benzyl bromide (0.015M)						VTNA
				Time	Bpin	Bromide	Product		[BPin] Adj	Norm Time BP	[Bromide]	Norm Time Bromide	[Pdt]	Norm Time Pdt		Time	Bpin	Bromide	Pdt		[BPin] Adj	Norm Time Bpin	[Bromide]	[Bromide] Adj	Norm Time Bromide	[Pdt]
				0	0.0690703	0.108251	0.00100769		0.0690703	0	0.158251	0	0.00100769	0		0	0.0681884	0.158287	0.00208369		0.0681884	0	0.158287	0.158287	0	0.00208369
				0.25	0.0495842	0.0898754	0.0204707		0.0495842	0.25	0.139875	0.25	0.0204707	0.25		0.25	0.0503404	0.138583	0.0171478		0.0503404	0.25	0.138583	0.138583	0.25	0.0171478
				0.5	0.0361765	0.0722847	0.0320047		0.0361765	0.5	0.122285	0.5	0.0320047	0.5		0.5	0.0383168	0.126537	0.0272746		0.0383168	0.5	0.126537	0.126537	0.5	0.0272746
ORDER IN BENZYL BROMIDE		0		0.75	0.0277622	0.0642978	0.0395988		0.0277622	0.75	0.114298	0.75	0.0395988	0.75		0.75	0.0304919	0.117134	0.0344992		0.0304919	0.75	0.117134	0.117134	0.75	0.0344992
				1	0.0219194	0.0562317	0.0450337		0.0219194	1	0.106232	1	0.0450337	1		1	0.0238897	0.109602	0.0397496		0.0238897	1	0.109602	0.109602	1	0.0397496
				1.25	0.0166686	0.0516712	0.0486107		0.0166686	1.25	0.101671	1.25	0.0486107	1.25		1.25	0.0192518	0.103069	0.0441767		0.0192518	1.25	0.103069	0.103069	1.25	0.0441767
				1.5	0.0132135	0.0471937	0.0509721		0.0132135	1.5	0.0971937	1.5	0.0509721	1.5		1.5	0.0150474	0.0986444	0.0477636		0.0150474	1.5	0.0986444	0.0986444	1.5	0.0477636
				1.75	0.0100865	0.043023	0.0542157		0.0100865	1.75	0.093023	1.75	0.0542157	1.75		1.75	0.0118501	0.094664	0.0505503		0.0118501	1.75	0.094664	0.094664	1.75	0.0505503
				2	0.00786926	0.0413751	0.0552637		0.00786926	2	0.0913751	2	0.0552637	2		2	0.00909553	0.0907193	0.0528774		0.00909553	2	0.0907193	0.0907193	2	0.0528774
				2.25	0.00607319	0.0389529	0.0563463		0.00607319	2.25	0.0889529	2.25	0.0563463	2.25		2.25	0.00707389	0.0880771	0.0543343		0.00707389	2.25	0.0880771	0.0880771	2.25	0.0543343
				2.5	0.0048444	0.0378927	0.0579972		0.0048444	2.5	0.0878927	2.5	0.0579972	2.5		2.5	0.00496455	0.0851441	0.0559915		0.00496455	2.5	0.0851441	0.0851441	2.5	0.0559915
				2.75	0.00387393	0.0354036	0.0577631		0.00387393	2.75	0.0854036	2.75	0.0577631	2.75		2.75	0.00333027	0.0832001	0.0573116		0.00333027	2.75	0.0832001	0.0832001	2.75	0.0573116
				3	0.00322119	0.0350726	0.05975		0.00322119	3	0.0850726	3	0.05975	3		3	0.00215407	0.0811175	0.0582586		0.00215407	3	0.0811175	0.0811175	3	0.0582586
				3.25	0.00273947	0.0335916	0.0591677		0.00273947	3.25	0.0835916	3.25	0.0591677	3.25		3.25	0.00149833	0.0803102	0.0588307		0.00149833	3.25	0.0803102	0.0803102	3.25	0.0588307
				3.5	0.00233462	0.0336715	0.0599135		0.00233462	3.5	0.0836715	3.5	0.0599135	3.5		3.5	0.00129992	0.0792627	0.0587357		0.00129992	3.5	0.0792627	0.0792627	3.5	0.0587357
				3.75	0.00205429	0.0334136	0.0601107		0.00205429	3.75	0.0834136	3.75	0.0601107	3.75		3.75	0.00126639	0.0782987	0.0589451		0.00126639	3.75	0.0782987	0.0782987	3.75	0.0589451
				4	0.0018411	0.0328593	0.0594521		0.0018411	4	0.0828593	4	0.0594521	4		4	0.00123026	0.0772133	0.0589451		0.00123026	4	0.0772133	0.0772133	4	0.0589451
				4.25	0.00171577	0.0320987	0.0609076		0.00171577	4.25	0.0820987	4.25	0.0609076	4.25		4.25
				4.5	0.00161523	0.0319121	0.0605998		0.00161523	4.5	0.0819121	4.5	0.0605998	4.5		4.5
				4.75	0.00158567	0.0315009	0.060715		0.00158567	4.75	0.0815009	4.75	0.060715	4.75		4.75
				5.25	0.00155855	0.0314826	0.0605339		0.00155855	5.25	0.0814826	5.25	0.0605339	5.25		5.25
				5.75	0.00153128	0.030202	0.0606364		0.00153128	5.75	0.080202	5.75	0.0606364	5.75		5.75
				6.25	0.001483	0.0293212	0.0605259		0.001483	6.25	0.0793212	6.25	0.0605259	6.25		6.25
				6.75	0.00154789	0.0290732	0.0615284		0.00154789	6.75	0.0790732	6.75	0.0615284	6.75		6.75
				7.25	0.0015821	0.0286332	0.0617994		0.0015821	7.25	0.0786332	7.25	0.0617994	7.25		7.25

## Sheet: Different excess in BPin
								Different excess in BPin
	iCLC Raw Data (peak area)											Concentration
	std (0.075M)				Reduced Bpin (0.0375M)						std				Reduced Bpin (0.0375M)				Increased Bpin (0.1125M BPin)				std-2
time	Phenyl BPin	benzyl bromide	Product		BPin	Benzyl bromide	product			time	Phenyl BPin	benzyl bromide	Product		BPin	Benzyl bromide	product		BPin	Benzyl bromide	product		BPin	Benzyl bromide	product
0	2.22938	2.18604	0.0144489		1.15113	2.30957	0.058588			0	0.0690703	0.108251	0.00100769		0.0355635	0.114131	0.00222465		0.107649	0.1072	0.0038496		0.071654	0.108316	0.00244158
0.25	1.60232	1.8	0.720373		0.747252	1.96667	0.333817			0.25	0.0495842	0.0898754	0.0204707		0.0230128	0.0978088	0.00981299		0.0894678	0.0806105	0.0284094		0.0472476	0.0868649	0.0220357
0.5	1.17086	1.43046	1.13871		0.448014	1.75527	0.608067			0.5	0.0361765	0.0722847	0.0320047		0.0137139	0.0877461	0.0173743		0.0724715	0.0624187	0.0435413		0.0338776	0.0701528	0.0332288
0.75	0.900086	1.26267	1.41415		0.263743	1.61324	0.783978			0.75	0.0277622	0.0642978	0.0395988		0.00798767	0.0809855	0.0222244		0.061241	0.0492868	0.0540546		0.0252244	0.0606576	0.0409349
1	0.712068	1.09321	1.61127		0.138613	1.51822	0.904218			1	0.0219194	0.0562317	0.0450337		0.00409921	0.0764622	0.0255395		0.052533	0.0376538	0.061057		0.0189221	0.0537114	0.0462213
1.25	0.543095	0.997409	1.74101		0.0702382	1.45511	0.966737			1.25	0.0166686	0.0516712	0.0486107		0.00197446	0.0734582	0.0272632		0.0452603	0.0275192	0.0653615		0.0144558	0.048519	0.0503044
1.5	0.43191	0.903344	1.82666		0.0476258	1.43031	0.987729			1.5	0.0132135	0.0471937	0.0509721		0.00127178	0.0722778	0.027842		0.0387701	0.0191722	0.0707469		0.0110428	0.0444113	0.0531203
1.75	0.331284	0.815728	1.9443		0.0468864	1.41525	0.989438			1.75	0.0100865	0.043023	0.0542157		0.0012488	0.071561	0.0278891		0.033534	0.0113185	0.0768067		0.0085147	0.04156	0.0552253
2	0.259933	0.781108	1.98231		0.047326	1.40141	0.988418			2	0.00786926	0.0413751	0.0552637		0.00126246	0.0709022	0.027861		0.0288422	0.00461413	0.0796773		0.00669379	0.0393252	0.0569974
2.25	0.202135	0.730222	2.02158							2.25	0.00607319	0.0389529	0.0563463						0.0276322	0.00414525	0.0805894		0.00519277	0.0372924	0.0576865
2.5	0.162593	0.707951	2.08146							2.5	0.0048444	0.0378927	0.0579972										0.00413913	0.0359217	0.0587705
2.75	0.131363	0.65566	2.07297							2.75	0.00387393	0.0354036	0.0577631										0.00344848	0.0349141	0.0598534
3	0.110358	0.648705	2.14503							3	0.00322119	0.0350726	0.05975										0.00290549	0.033961	0.0598248
3.25	0.0948561	0.617591	2.12391							3.25	0.00273947	0.0335916	0.0591677										0.00253224	0.0334363	0.0603129
3.5	0.081828	0.619272	2.15096							3.5	0.00233462	0.0336715	0.0599135										0.00223315	0.0327225	0.0603668
3.75	0.0728072	0.613852	2.15812							3.75	0.00205429	0.0334136	0.0601107										0.00196182	0.0322733	0.0605311
4	0.0659466	0.602209	2.13423							4	0.0018411	0.0328593	0.0594521
4.25	0.0619136	0.586229	2.18702							4.25	0.00171577	0.0320987	0.0609076
4.5	0.0586781	0.58231	2.17585							4.5	0.00161523	0.0319121	0.0605998
4.75	0.0577268	0.573671	2.18003							4.75	0.00158567	0.0315009	0.060715
5.25	0.0568542	0.573287	2.17346							5.25	0.00155855	0.0314826	0.0605339
5.75	0.0559766	0.546385	2.17718							5.75	0.00153128	0.030202	0.0606364
6.25	0.0544229	0.527881	2.17317							6.25	0.001483	0.0293212	0.0605259
6.75	0.0565112	0.522669	2.20953							6.75	0.00154789	0.0290732	0.0615284
7.25	0.0576118	0.513425	2.21936							7.25	0.0015821	0.0286332	0.0617994
				Std Conditions						VTNA						Reduced Bpin 0.0375M						VTNA
				Time	Bpin std	Benzyl bromide std	Product std		[BPin] std Adj	Norm Time BP std	[Bromide] std	Norm Time Bromide std	[Pdt] std	Norm Time Pdt std		Time	Bpin 193	Benzyl bromide 193	Pdt 193		[BPin] Adj 193	Norm Time BPin 193	[Bromide] 193	[Bromide] Adj 193	Norm Time Bromide 193	[Pdt] 193
				0	0.0690703	0.108251	0.00100769		0.0690703	0	0.108251	0	0.00100769	0		0	0.0355635	0.114131	0.00222465		0.0690705	0	0.114131	0.115615	0	0.00222465
				0.25	0.0495842	0.0898754	0.0204707		0.0495842	0.0300525	0.0898754	0.0441443	0.0204707	0.00834006		0.25	0.0230128	0.0978088	0.00981299		0.0565198	0.0176994	0.0978088	0.0992928	0.046433	0.00981299
				0.5	0.0361765	0.0722847	0.0320047		0.0361765	0.0536103	0.0722847	0.0821304	0.0320047	0.0246381		0.5	0.0137139	0.0877461	0.0173743		0.0472209	0.0301705	0.0877461	0.0892301	0.0884594	0.0173743
ORDER IN BPIN		0.75		0.75	0.0277622	0.0642978	0.0395988		0.0277622	0.0725115	0.0642978	0.115528	0.0395988	0.0452144		0.75	0.00798767	0.0809855	0.0222244		0.0414947	0.0385755	0.0809855	0.0824695	0.127594	0.0222244
				1	0.0219194	0.0562317	0.0450337		0.0219194	0.0881543	0.0562317	0.145936	0.0450337	0.0685393		1	0.00409921	0.0764622	0.0255395		0.0376062	0.0439943	0.0764622	0.0779462	0.16475	0.0255395
				1.25	0.0166686	0.0516712	0.0486107		0.0166686	0.101096	0.0516712	0.173922	0.0486107	0.0937033		1.25	0.00197446	0.0734582	0.0272632		0.0354815	0.0472284	0.0734582	0.0749422	0.200564	0.0272632
				1.5	0.0132135	0.0471937	0.0509721		0.0132135	0.11178	0.0471937	0.200131	0.0509721	0.120055		1.5	0.00127178	0.0722778	0.027842		0.0347788	0.04925	0.0722778	0.0737618	0.235627	0.027842
				1.75	0.0100865	0.043023	0.0542157		0.0100865	0.120645	0.043023	0.224601	0.0542157	0.147511		1.75	0.0012488	0.071561	0.0278891		0.0347558	0.0509222	0.071561	0.073045	0.270347	0.0278891
				2	0.00786926	0.0413751	0.0552637		0.00786926	0.127937	0.0413751	0.247877	0.0552637	0.175803		2	0.00126246	0.0709022	0.027861		0.0347695	0.0525898	0.0709022	0.0723862	0.304817	0.027861
				2.25	0.00607319	0.0389529	0.0563463		0.00607319	0.133968	0.0389529	0.270307	0.0563463	0.204507
				2.5	0.0048444	0.0378927	0.0579972		0.0048444	0.138989	0.0378927	0.292003	0.0579972	0.233737
				2.75	0.00387393	0.0354036	0.0577631		0.00387393	0.14323	0.0354036	0.312943	0.0577631	0.263238
				3	0.00322119	0.0350726	0.05975		0.00322119	0.146864	0.0350726	0.333276	0.05975	0.293074
				3.25	0.00273947	0.0335916	0.0591677		0.00273947	0.150053	0.0335916	0.353215	0.0591677	0.323176
				3.5	0.00233462	0.0336715	0.0599135		0.00233462	0.152879	0.0336715	0.372849	0.0599135	0.35331
				3.75	0.00205429	0.0334136	0.0601107		0.00205429	0.155414	0.0334136	0.392444	0.0601107	0.383622
				4	0.0018411	0.0328593	0.0594521		0.0018411	0.157732	0.0328593	0.41186	0.0594521	0.413847
				4.25	0.00171577	0.0320987	0.0609076		0.00171577	0.159897	0.0320987	0.430987	0.0609076	0.444223
				4.5	0.00161523	0.0319121	0.0605998		0.00161523	0.161958	0.0319121	0.449904	0.0605998	0.474816
				4.75	0.00158567	0.0315009	0.060715		0.00158567	0.163958	0.0315009	0.468689	0.060715	0.505372
				5.25	0.00155855	0.0314826	0.0605339		0.00155855	0.167906	0.0314826	0.506067	0.0605339	0.56646
				5.75	0.00153128	0.030202	0.0606364		0.00153128	0.171802	0.030202	0.542865	0.0606364	0.627518
				6.25	0.001483	0.0293212	0.0605259		0.001483	0.175627	0.0293212	0.578692	0.0605259	0.688573
				6.75	0.00154789	0.0290732	0.0615284		0.00154789	0.179467	0.0290732	0.614009	0.0615284	0.749966
				7.25	0.0015821	0.0286332	0.0617994		0.0015821	0.183401	0.0286332	0.649013	0.0617994	0.811837
	iCLC Raw Data (peak area)											Concentration
	std (0.075M)				Increased Bpin (0.1125M)						std (0.075M BPin)				Increased Bpin (0.1125M BPin)
time	Phenyl BPin	benzyl bromide	Product		BPin	Benzyl bromide	product			time	Phenyl BPin	benzyl bromide	Product		BPin	Benzyl bromide	product
0	2.22938	2.18604	0.0144489		3.47086	2.16395	0.117525			0	0.0690703	0.108251	0.00100769		0.107649	0.1072	0.0038496
0.25	1.60232	1.8	0.720373		2.88578	1.60537	1.00831			0.25	0.0495842	0.0898754	0.0204707		0.0894678	0.0806105	0.0284094
0.5	1.17086	1.43046	1.13871		2.33883	1.22319	1.55714			0.5	0.0361765	0.0722847	0.0320047		0.0724715	0.0624187	0.0435413
0.75	0.900086	1.26267	1.41415		1.97744	0.947318	1.93846			0.75	0.0277622	0.0642978	0.0395988		0.061241	0.0492868	0.0540546
1	0.712068	1.09321	1.61127		1.69721	0.702932	2.19244			1	0.0219194	0.0562317	0.0450337		0.052533	0.0376538	0.061057
1.25	0.543095	0.997409	1.74101		1.46317	0.490023	2.34856			1.25	0.0166686	0.0516712	0.0486107		0.0452603	0.0275192	0.0653615
1.5	0.43191	0.903344	1.82666		1.25432	0.31467	2.54389			1.5	0.0132135	0.0471937	0.0509721		0.0387701	0.0191722	0.0707469
1.75	0.331284	0.815728	1.9443		1.08583	0.14968	2.76368			1.75	0.0100865	0.043023	0.0542157		0.033534	0.0113185	0.0768067
2	0.259933	0.781108	1.98231		0.934842	0.00883358	2.8678			2	0.00786926	0.0413751	0.0552637		0.0288422	0.00461413	0.0796773
2.25	0.202135	0.730222	2.02158		0.895903	-0.00101661	2.90088			2.25	0.00607319	0.0389529	0.0563463		0.0276322	0.00414525	0.0805894
2.5	0.162593	0.707951	2.08146							2.5	0.0048444	0.0378927	0.0579972
2.75	0.131363	0.65566	2.07297							2.75	0.00387393	0.0354036	0.0577631
3	0.110358	0.648705	2.14503							3	0.00322119	0.0350726	0.05975
3.25	0.0948561	0.617591	2.12391							3.25	0.00273947	0.0335916	0.0591677
3.5	0.081828	0.619272	2.15096							3.5	0.00233462	0.0336715	0.0599135
3.75	0.0728072	0.613852	2.15812							3.75	0.00205429	0.0334136	0.0601107
4	0.0659466	0.602209	2.13423							4	0.0018411	0.0328593	0.0594521
4.25	0.0619136	0.586229	2.18702							4.25	0.00171577	0.0320987	0.0609076
4.5	0.0586781	0.58231	2.17585							4.5	0.00161523	0.0319121	0.0605998
4.75	0.0577268	0.573671	2.18003							4.75	0.00158567	0.0315009	0.060715
5.25	0.0568542	0.573287	2.17346							5.25	0.00155855	0.0314826	0.0605339
5.75	0.0559766	0.546385	2.17718							5.75	0.00153128	0.030202	0.0606364
6.25	0.0544229	0.527881	2.17317							6.25	0.001483	0.0293212	0.0605259
6.75	0.0565112	0.522669	2.20953							6.75	0.00154789	0.0290732	0.0615284
7.25	0.0576118	0.513425	2.21936							7.25	0.0015821	0.0286332	0.0617994
				Std Conditions						VTNA						Increased Bpin 0.1125M						VTNA
				Time	Bpin std	Benzyl bromide std	Product std		[BPin] std Adj	Norm Time BP std	[Bromide] std	Norm Time Bromide std	[Pdt] std	Norm Time Pdt std		Time	Bpin	Benzyl bromide 163	Pdt 163		[BPin] Adj 163	Norm Time BPin 163	[Bromide] 163	[Bromide] Adj 163	Norm Time Bromide 163	[Pdt] 163
				0	0.0690703	0.108251	0.00100769		0.10771	0	0.108251	0	0.00100769	0		0	0.107649	0.1072	0.0038496		0.107649	0	0.1072	0.1072	0	0.0038496
				0.25	0.0495842	0.0898754	0.0204707		0.0882242	0.0459084	0.0898754	0.0624435	0.0204707	0.0164635		0.25	0.0894678	0.0806105	0.0284094		0.0894678	0.0622525	0.0806105	0.0806105	0.0604719	0.0284094
				0.5	0.0361765	0.0722847	0.0320047		0.0748165	0.0836913	0.0722847	0.117815	0.0320047	0.0446017		0.5	0.0724715	0.0624187	0.0435413		0.0724715	0.117579	0.0624187	0.0624187	0.111826	0.0435413
ORDER IN BPIN		0.6		0.75	0.0277622	0.0642978	0.0395988		0.0664022	0.115371	0.0642978	0.167768	0.0395988	0.0785081		0.75	0.061241	0.0492868	0.0540546		0.061241	0.166899	0.0492868	0.0492868	0.156102	0.0540546
				1	0.0219194	0.0562317	0.0450337		0.0605594	0.1426	0.0562317	0.21411	0.0450337	0.115992		1	0.052533	0.0376538	0.061057		0.052533	0.211665	0.0376538	0.0376538	0.194196	0.061057
				1.25	0.0166686	0.0516712	0.0486107		0.0553086	0.165999	0.0516712	0.257476	0.0486107	0.155822		1.25	0.0452603	0.0275192	0.0653615		0.0452603	0.252545	0.0275192	0.0275192	0.226241	0.0653615
				1.5	0.0132135	0.0471937	0.0509721		0.0518535	0.18607	0.0471937	0.298623	0.0509721	0.197149		1.5	0.0387701	0.0191722	0.0707469		0.0387701	0.289869	0.0191722	0.0191722	0.252475	0.0707469
				1.75	0.0100865	0.043023	0.0542157		0.0487265	0.203358	0.043023	0.337572	0.0542157	0.239856		1.75	0.033534	0.0113185	0.0768067		0.033534	0.323974	0.0113185	0.0113185	0.27279	0.0768067
				2	0.00786926	0.0413751	0.0552637		0.0465093	0.218144	0.0413751	0.374994	0.0552637	0.2836		2	0.0288422	0.00461413	0.0796773		0.0288422	0.355187	0.00461413	0.00461413	0.286553	0.0796773
				2.25	0.00607319	0.0389529	0.0563463		0.0447132	0.230847	0.0389529	0.411322	0.0563463	0.327854		2.25	0.0276322	0.00414525	0.0805894		0.0276322	0.384592	0.00414525	0.00414525	0.296165	0.0805894
				2.5	0.0048444	0.0378927	0.0579972		0.0434844	0.241817	0.0378927	0.446697	0.0579972	0.372754
				2.75	0.00387393	0.0354036	0.0577631		0.0425139	0.251402	0.0354036	0.481082	0.0577631	0.417987
				3	0.00322119	0.0350726	0.05975		0.0418612	0.259872	0.0350726	0.514667	0.05975	0.46363
				3.25	0.00273947	0.0335916	0.0591677		0.0413795	0.267502	0.0335916	0.547731	0.0591677	0.5096
				3.5	0.00233462	0.0336715	0.0599135		0.0409746	0.274428	0.0336715	0.580389	0.0599135	0.555607
				3.75	0.00205429	0.0334136	0.0601107		0.0406943	0.280778	0.0334136	0.612995	0.0601107	0.601833
				4	0.0018411	0.0328593	0.0594521		0.0404811	0.286689	0.0328593	0.645364	0.0594521	0.647952
				4.25	0.00171577	0.0320987	0.0609076		0.0403558	0.292286	0.0320987	0.677345	0.0609076	0.694255
				4.5	0.00161523	0.0319121	0.0605998		0.0402552	0.297667	0.0319121	0.709047	0.0605998	0.740822
				4.75	0.00158567	0.0315009	0.060715		0.0402257	0.302921	0.0315009	0.74057	0.060715	0.787346
				5.25	0.00155855	0.0314826	0.0605339		0.0401986	0.313317	0.0314826	0.803359	0.0605339	0.880362
				5.75	0.00153128	0.030202	0.0606364		0.0401713	0.323604	0.030202	0.865369	0.0606364	0.973342
				6.25	0.001483	0.0293212	0.0605259		0.040123	0.33374	0.0293212	0.926065	0.0605259	1.06632
				6.75	0.00154789	0.0290732	0.0615284		0.0401879	0.34391	0.0290732	0.986069	0.0615284	1.1597
				7.25	0.0015821	0.0286332	0.0617994		0.0402221	0.354277	0.0286332	1.04565	0.0617994	1.25367

## Sheet: Different excess in Catalyst
							Different excess in catalyst
	iCLC Raw Data (peak area)											Concentration
	std (5mol%)				Reduced catalyst (2.5mol%)						std				Reduced catalyst (2.5mol%)				Reduced Catalyst (1.25mol%)				std-2
time	Phenyl BPin	benzyl bromide	Product		BPin	Benzyl bromide	product			time	Phenyl BPin	benzyl bromide	Product		BPin	Benzyl bromide	product		BPin	Benzyl bromide	product		BPin	Benzyl bromide	product
0	2.22938	2.18604	0.0144489		2.2269	2.18853	0.121555			0	0.0690703	0.108251	0.00100769		0.0689931	0.10837	0.00396071		0.0714282	0.113829	0.00138139		0.071654	0.108316	0.00244158
0.25	1.60232	1.8	0.720373		1.86955	1.9385	0.433159			0.25	0.0495842	0.0898754	0.0204707		0.0578884	0.0964678	0.0125519		0.0632205	0.10458	0.00765007		0.0472476	0.0868649	0.0220357
0.5	1.17086	1.43046	1.13871		1.62563	1.7628	0.686258			0.5	0.0361765	0.0722847	0.0320047		0.0503085	0.0881043	0.0195301		0.0558083	0.0962812	0.0147934		0.0338776	0.0701528	0.0332288
0.75	0.900086	1.26267	1.41415		1.42026	1.61858	0.873849			0.75	0.0277622	0.0642978	0.0395988		0.0439265	0.0812394	0.0247022		0.0504153	0.0911916	0.0188342		0.0252244	0.0606576	0.0409349
1	0.712068	1.09321	1.61127		1.26522	1.50613	1.02652			1	0.0219194	0.0562317	0.0450337		0.0391088	0.0758869	0.0289115		0.0464648	0.0860521	0.0218808		0.0189221	0.0537114	0.0462213
1.25	0.543095	0.997409	1.74101		1.12597	1.40617	1.15075			1.25	0.0166686	0.0516712	0.0486107		0.0347814	0.0711288	0.0323365		0.043492	0.082472	0.0246812		0.0144558	0.048519	0.0503044
1.5	0.43191	0.903344	1.82666		1.00952	1.31751	1.27497			1.5	0.0132135	0.0471937	0.0509721		0.0311629	0.0669083	0.0357615		0.0406582	0.0799582	0.0269691		0.0110428	0.0444113	0.0531203
1.75	0.331284	0.815728	1.9443		0.91016	1.24359	1.37328			1.75	0.0100865	0.043023	0.0542157		0.0280752	0.0633896	0.0384721		0.0383765	0.077621	0.028793		0.0085147	0.04156	0.0552253
2	0.259933	0.781108	1.98231		0.820094	1.1758	1.46159			2	0.00786926	0.0413751	0.0552637		0.0252764	0.0601629	0.0409068		0.0363748	0.0752087	0.0300464		0.00669379	0.0393252	0.0569974
2.25	0.202135	0.730222	2.02158		0.735062	1.11438	1.53516			2.25	0.00607319	0.0389529	0.0563463		0.022634	0.0572391	0.0429353		0.034375	0.0727646	0.0317927		0.00519277	0.0372924	0.0576865
2.5	0.162593	0.707951	2.08146		0.662576	1.05456	1.59901			2.5	0.0048444	0.0378927	0.0579972		0.0203815	0.0543915	0.0446956		0.0327006	0.070634	0.0331949		0.00413913	0.0359217	0.0587705
2.75	0.131363	0.65566	2.07297		0.594189	1.00305	1.6744			2.75	0.00387393	0.0354036	0.0577631		0.0182563	0.0519399	0.0467742		0.0309427	0.0687144	0.0347907		0.00344848	0.0349141	0.0598534
3	0.110358	0.648705	2.14503		0.520538	0.943242	1.73302			3	0.00322119	0.0350726	0.05975		0.0159676	0.0490928	0.0483905		0.0290826	0.0661125	0.0357988		0.00290549	0.033961	0.0598248
3.25	0.0948561	0.617591	2.12391		0.4563	0.891718	1.79131			3.25	0.00273947	0.0335916	0.0591677		0.0139714	0.0466402	0.0499976		0.0275411	0.0642324	0.0372247		0.00253224	0.0334363	0.0603129
3.5	0.081828	0.619272	2.15096		0.393722	0.84684	1.8544			3.5	0.00233462	0.0336715	0.0599135		0.0120268	0.044504	0.0517369		0.0259354	0.0617626	0.0385438		0.00223315	0.0327225	0.0603668
3.75	0.0728072	0.613852	2.15812		0.337567	0.80168	1.90581			3.75	0.00205429	0.0334136	0.0601107		0.0102818	0.0423543	0.0531544		0.0243457	0.0601566	0.039834		0.00196182	0.0322733	0.0605311
4	0.0659466	0.602209	2.13423		0.287466	0.762695	1.94761			4	0.0018411	0.0328593	0.0594521		0.00872486	0.0404986	0.054307		0.0227617	0.0582466	0.0412373
4.25	0.0619136	0.586229	2.18702		0.241976	0.726958	1.98565			4.25	0.00171577	0.0320987	0.0609076		0.00731124	0.0387975	0.0553556		0.0213845	0.0562607	0.0423021
4.5	0.0586781	0.58231	2.17585		0.198182	0.693916	2.02704			4.5	0.00161523	0.0319121	0.0605998		0.00595034	0.0372247	0.0564967		0.0199089	0.0545632	0.0433667
4.75	0.0577268	0.573671	2.18003		0.165094	0.664149	2.06253			4.75	0.00158567	0.0315009	0.060715		0.00492213	0.0358077	0.0574754		0.0185897	0.0529147	0.0440633
5.25	0.0568542	0.573287	2.17346		0.112873	0.632953	2.18244			5.25	0.00155855	0.0314826	0.0605339		0.00329935	0.0343228	0.0607813		0.0152351	0.0490667	0.0482224
5.75	0.0559766	0.546385	2.17718		0.083445	0.60649	2.18544			5.75	0.00153128	0.030202	0.0606364		0.00238487	0.0330631	0.060864		0.0119843	0.0448814	0.0505859
6.25	0.0544229	0.527881	2.17317		0.0708857	0.579501	2.20776			6.25	0.001483	0.0293212	0.0605259		0.00199458	0.0317784	0.0614794		0.0090353	0.0412728	0.0528185
6.75	0.0565112	0.522669	2.20953		0.0662887	0.565041	2.20989			6.75	0.00154789	0.0290732	0.0615284		0.00185173	0.0310901	0.0615381		0.00679475	0.0383645	0.0542318
7.25	0.0576118	0.513425	2.21936		0.069356	0.551667	2.21265			7.25	0.0015821	0.0286332	0.0617994		0.00194705	0.0304535	0.0616143		0.00499641	0.0358829	0.0553086
																			0.00380825	0.0339934	0.056285
																			0.00300098	0.0325063	0.0569344
																			0.00245059	0.0314321	0.0572221
																			0.00244904	0.0310315	0.0575746
				5% Std Conditions						Std VTNA						2.5% Cat						VTNA
				Time	Bpin std	Bromide std	Product std	Cat std	[BPin] std	Norm Time Cat std	[Bromide] std	Norm Time Bromide std	[Pdt] std	Norm Time Pdt std		Time	Bpin 189	Bromide 189	Product 189	Cat 189	[Bpin 189]	Norm Time Cat 189	[Bromide] 189	[Bromide] Adj 189	Norm Time Bromide 189	[Pdt] 189
				0	0.0690703	0.108251	0.00100769	0.005	0.0690703	0	0.108251	0	0.00100769	0		0	0.0689931	0.00443165	0.00396071	0.0025	0.0689931	0	0.00443165	0.00443165	0	0.00396071
				0.25	0.0495842	0.0898754	0.0204707	0.005	0.0495842	0.00125	0.0898754	0.0247658	0.0204707	0.0026848		0.25	0.0578884	0.0964678	0.0125519	0.0025	0.0578884	0.000625	0.0964678	0.0964678	0.0126124	0.0125519
				0.5	0.0361765	0.0722847	0.0320047	0.005	0.0361765	0.0025	0.0722847	0.0450358	0.0320047	0.00924422		0.5	0.0503085	0.0881043	0.0195301	0.0025	0.0503085	0.00125	0.0881043	0.0881043	0.035684	0.0195301
ORDER IN CAT		1		0.75	0.0277622	0.0642978	0.0395988	0.005	0.0277622	0.00375	0.0642978	0.0621086	0.0395988	0.0181947		0.75	0.0439265	0.0812394	0.0247022	0.0025	0.0439265	0.001875	0.0812394	0.0812394	0.0568519	0.0247022
				1	0.0219194	0.0562317	0.0450337	0.005	0.0219194	0.005	0.0562317	0.0771748	0.0450337	0.0287737		1	0.0391088	0.0758869	0.0289115	0.0025	0.0391088	0.0025	0.0758869	0.0758869	0.0764927	0.0289115
				1.25	0.0166686	0.0516712	0.0486107	0.005	0.0166686	0.00625	0.0516712	0.0906627	0.0486107	0.0404793		1.25	0.0347814	0.0711288	0.0323365	0.0025	0.0347814	0.003125	0.0711288	0.0711288	0.0948697	0.0323365
				1.5	0.0132135	0.0471937	0.0509721	0.005	0.0132135	0.0075	0.0471937	0.103021	0.0509721	0.0529271		1.5	0.0311629	0.0669083	0.0357615	0.0025	0.0311629	0.00375	0.0669083	0.0669083	0.112124	0.0357615
				1.75	0.0100865	0.043023	0.0542157	0.005	0.0100865	0.00875	0.043023	0.114298	0.0542157	0.0660756		1.75	0.0280752	0.0633896	0.0384721	0.0025	0.0280752	0.004375	0.0633896	0.0633896	0.128412	0.0384721
				2	0.00786926	0.0413751	0.0552637	0.005	0.00786926	0.01	0.0413751	0.124848	0.0552637	0.0797605		2	0.0252764	0.0601629	0.0409068	0.0025	0.0252764	0.005	0.0601629	0.0601629	0.143856	0.0409068
				2.25	0.00607319	0.0389529	0.0563463	0.005	0.00607319	0.01125	0.0389529	0.134889	0.0563463	0.0937118		2.25	0.022634	0.0572391	0.0429353	0.0025	0.022634	0.005625	0.0572391	0.0572391	0.158531	0.0429353
				2.5	0.0048444	0.0378927	0.0579972	0.005	0.0048444	0.0125	0.0378927	0.144494	0.0579972	0.108005		2.5	0.0203815	0.0543915	0.0446956	0.0025	0.0203815	0.00625	0.0543915	0.0543915	0.172485	0.0446956
				2.75	0.00387393	0.0354036	0.0577631	0.005	0.00387393	0.01375	0.0354036	0.153656	0.0577631	0.122475		2.75	0.0182563	0.0519399	0.0467742	0.0025	0.0182563	0.006875	0.0519399	0.0519399	0.185776	0.0467742
				3	0.00322119	0.0350726	0.05975	0.005	0.00322119	0.015	0.0350726	0.162466	0.05975	0.137164		3	0.0159676	0.0490928	0.0483905	0.0025	0.0159676	0.0075	0.0490928	0.0490928	0.198405	0.0483905
				3.25	0.00273947	0.0335916	0.0591677	0.005	0.00273947	0.01625	0.0335916	0.171049	0.0591677	0.152029		3.25	0.0139714	0.0466402	0.0499976	0.0025	0.0139714	0.008125	0.0466402	0.0466402	0.210372	0.0499976
				3.5	0.00233462	0.0336715	0.0599135	0.005	0.00233462	0.0175	0.0336715	0.179457	0.0599135	0.166914		3.5	0.0120268	0.044504	0.0517369	0.0025	0.0120268	0.00875	0.044504	0.044504	0.221765	0.0517369
				3.75	0.00205429	0.0334136	0.0601107	0.005	0.00205429	0.01875	0.0334136	0.187842	0.0601107	0.181917		3.75	0.0102818	0.0423543	0.0531544	0.0025	0.0102818	0.009375	0.0423543	0.0423543	0.232622	0.0531544
				4	0.0018411	0.0328593	0.0594521	0.005	0.0018411	0.02	0.0328593	0.196127	0.0594521	0.196862		4	0.00872486	0.0404986	0.054307	0.0025	0.00872486	0.01	0.0404986	0.0404986	0.242979	0.054307
				4.25	0.00171577	0.0320987	0.0609076	0.005	0.00171577	0.02125	0.0320987	0.204246	0.0609076	0.211907		4.25	0.00731124	0.0387975	0.0553556	0.0025	0.00731124	0.010625	0.0387975	0.0387975	0.252891	0.0553556
				4.5	0.00161523	0.0319121	0.0605998	0.005	0.00161523	0.0225	0.0319121	0.212248	0.0605998	0.227095		4.5	0.00595034	0.0372247	0.0564967	0.0025	0.00595034	0.01125	0.0372247	0.0372247	0.262394	0.0564967
				4.75	0.00158567	0.0315009	0.060715	0.005	0.00158567	0.02375	0.0315009	0.220174	0.060715	0.24226		4.75	0.00492213	0.0358077	0.0574754	0.0025	0.00492213	0.011875	0.0358077	0.0358077	0.271523	0.0574754
				5.25	0.00155855	0.0314826	0.0605339	0.005	0.00155855	0.02625	0.0314826	0.23592	0.0605339	0.272572		5.25	0.00329935	0.0343228	0.0607813	0.0025	0.00329935	0.013125	0.0343228	0.0343228	0.289055	0.0607813
				5.75	0.00153128	0.030202	0.0606364	0.005	0.00153128	0.02875	0.030202	0.251341	0.0606364	0.302865		5.75	0.00238487	0.0330631	0.060864	0.0025	0.00238487	0.014375	0.0330631	0.0330631	0.305902	0.060864
				6.25	0.001483	0.0293212	0.0605259	0.005	0.001483	0.03125	0.0293212	0.266222	0.0605259	0.333155		6.25	0.00199458	0.0317784	0.0614794	0.0025	0.00199458	0.015625	0.0317784	0.0317784	0.322112	0.0614794
				6.75	0.00154789	0.0290732	0.0615284	0.005	0.00154789	0.03375	0.0290732	0.280821	0.0615284	0.363669		6.75	0.00185173	0.0310901	0.0615381	0.0025	0.00185173	0.016875	0.0310901	0.0310901	0.337829	0.0615381
				7.25	0.0015821	0.0286332	0.0617994	0.005	0.0015821	0.03625	0.0286332	0.295247	0.0617994	0.394501		7.25	0.00194705	0.0304535	0.0616143	0.0025	0.00194705	0.018125	0.0304535	0.0304535	0.353215	0.0616143
	iCLC Raw Data (peak area)											Concentration
	std (5mol%)				Reduced Catalyst (1.25mol%)						std				Reduced Catalyst (1.25mol%)
time	Phenyl BPin	benzyl bromide	Product		BPin	Benzyl bromide	product			time	Phenyl BPin	benzyl bromide	Product		BPin	Benzyl bromide	product
0	2.22938	2.18604	0.0144489		2.30526	2.30322	0.028003			0	0.0690703	0.108251	0.00100769		0.0714282	0.113829	0.00138139
0.25	1.60232	1.8	0.720373		2.04113	2.10891	0.255368			0.25	0.0495842	0.0898754	0.0204707		0.0632205	0.10458	0.00765007
0.5	1.17086	1.43046	1.13871		1.80261	1.93457	0.514456			0.5	0.0361765	0.0722847	0.0320047		0.0558083	0.0962812	0.0147934
0.75	0.900086	1.26267	1.41415		1.62907	1.82765	0.661018			0.75	0.0277622	0.0642978	0.0395988		0.0504153	0.0911916	0.0188342
1	0.712068	1.09321	1.61127		1.50194	1.71968	0.771515			1	0.0219194	0.0562317	0.0450337		0.0464648	0.0860521	0.0218808
1.25	0.543095	0.997409	1.74101		1.40627	1.64447	0.873087			1.25	0.0166686	0.0516712	0.0486107		0.043492	0.082472	0.0246812
1.5	0.43191	0.903344	1.82666		1.31508	1.59166	0.95607			1.5	0.0132135	0.0471937	0.0509721		0.0406582	0.0799582	0.0269691
1.75	0.331284	0.815728	1.9443		1.24166	1.54256	1.02222			1.75	0.0100865	0.043023	0.0542157		0.0383765	0.077621	0.028793
2	0.259933	0.781108	1.98231		1.17724	1.49188	1.06768			2	0.00786926	0.0413751	0.0552637		0.0363748	0.0752087	0.0300464
2.25	0.202135	0.730222	2.02158		1.11289	1.44054	1.13102			2.25	0.00607319	0.0389529	0.0563463		0.034375	0.0727646	0.0317927
2.5	0.162593	0.707951	2.08146		1.05901	1.39578	1.18188			2.5	0.0048444	0.0378927	0.0579972		0.0327006	0.070634	0.0331949
2.75	0.131363	0.65566	2.07297		1.00244	1.35545	1.23976			2.75	0.00387393	0.0354036	0.0577631		0.0309427	0.0687144	0.0347907
3	0.110358	0.648705	2.14503		0.942579	1.30079	1.27632			3	0.00322119	0.0350726	0.05975		0.0290826	0.0661125	0.0357988
3.25	0.0948561	0.617591	2.12391		0.892973	1.26129	1.32804			3.25	0.00273947	0.0335916	0.0591677		0.0275411	0.0642324	0.0372247
3.5	0.081828	0.619272	2.15096		0.841302	1.20941	1.37588			3.5	0.00233462	0.0336715	0.0599135		0.0259354	0.0617626	0.0385438
3.75	0.0728072	0.613852	2.15812		0.790144	1.17567	1.42268			3.75	0.00205429	0.0334136	0.0601107		0.0243457	0.0601566	0.039834
4	0.0659466	0.602209	2.13423		0.739173	1.13554	1.47358			4	0.0018411	0.0328593	0.0594521		0.0227617	0.0582466	0.0412373
4.25	0.0619136	0.586229	2.18702		0.694853	1.09382	1.5122			4.25	0.00171577	0.0320987	0.0609076		0.0213845	0.0562607	0.0423021
4.5	0.0586781	0.58231	2.17585		0.647368	1.05816	1.55081			4.5	0.00161523	0.0319121	0.0605998		0.0199089	0.0545632	0.0433667
4.75	0.0577268	0.573671	2.18003		0.604915	1.02353	1.57608			4.75	0.00158567	0.0315009	0.060715		0.0185897	0.0529147	0.0440633
5.25	0.0568542	0.573287	2.17346		0.496965	0.942694	1.72692			5.25	0.00155855	0.0314826	0.0605339		0.0152351	0.0490667	0.0482224
5.75	0.0559766	0.546385	2.17718		0.392355	0.854769	1.81265			5.75	0.00153128	0.030202	0.0606364		0.0119843	0.0448814	0.0505859
6.25	0.0544229	0.527881	2.17317		0.297456	0.778959	1.89363			6.25	0.001483	0.0293212	0.0605259		0.0090353	0.0412728	0.0528185
6.75	0.0565112	0.522669	2.20953		0.225355	0.717861	1.94489			6.75	0.00154789	0.0290732	0.0615284		0.00679475	0.0383645	0.0542318
7.25	0.0576118	0.513425	2.21936		0.167485	0.665729	1.98394			7.25	0.0015821	0.0286332	0.0617994		0.00499641	0.0358829	0.0553086
					0.129249	0.626033	2.01936			7.75					0.00380825	0.0339934	0.056285
					0.103271	0.594792	2.04291			8.25					0.00300098	0.0325063	0.0569344
					0.08556	0.572225	2.05334			8.75					0.00245059	0.0314321	0.0572221
					0.08551	0.56381	2.06613			9.25					0.00244904	0.0310315	0.0575746
				5% Std Conditions						Std VTNA						1.25% Cat						VTNA
				Time	Bpin std	Bromide std	Product std	Cat std	[BPin] std	Norm Time Cat std	[Bromide] std	Norm Time Bromide std	[Pdt] std	Norm Time Pdt std		Time	Bpin 194	Bromide 194	Product 194	Cat 194	[Bpin 194]	Norm Time Cat 194	[Bromide] 194	[Bromide] Adj 194	Norm Time Bromide 194	[Pdt] 194
				0	0.0690703	0.108251	0.00100769	0.005	0.0690703	0	0.108251	0	0.00100769	0		0	0.0714282	0.113829	0.00138139	0.00125	0.0714282	0	0.113829	0.113829	0	0.00138139
				0.25	0.0495842	0.0898754	0.0204707	0.005	0.0495842	0.00125	0.0898754	0.0247658	0.0204707	0.0026848		0.25	0.0632205	0.10458	0.00765007	0.00125	0.0632205	0.0003125	0.10458	0.10458	0.0273011	0.00765007
				0.5	0.0361765	0.0722847	0.0320047	0.005	0.0361765	0.0025	0.0722847	0.0450358	0.0320047	0.00924422		0.5	0.0558083	0.0962812	0.0147934	0.00125	0.0558083	0.000625	0.0962812	0.0962812	0.0524087	0.0147934
ORDER IN CAT		1		0.75	0.0277622	0.0642978	0.0395988	0.005	0.0277622	0.00375	0.0642978	0.0621086	0.0395988	0.0181947		0.75	0.0504153	0.0911916	0.0188342	0.00125	0.0504153	0.0009375	0.0911916	0.0911916	0.0758428	0.0188342
				1	0.0219194	0.0562317	0.0450337	0.005	0.0219194	0.005	0.0562317	0.0771748	0.0450337	0.0287737		1	0.0464648	0.0860521	0.0218808	0.00125	0.0464648	0.00125	0.0860521	0.0860521	0.0979982	0.0218808
				1.25	0.0166686	0.0516712	0.0486107	0.005	0.0166686	0.00625	0.0516712	0.0906627	0.0486107	0.0404793		1.25	0.043492	0.082472	0.0246812	0.00125	0.043492	0.0015625	0.082472	0.082472	0.119064	0.0246812
				1.5	0.0132135	0.0471937	0.0509721	0.005	0.0132135	0.0075	0.0471937	0.103021	0.0509721	0.0529271		1.5	0.0406582	0.0799582	0.0269691	0.00125	0.0406582	0.001875	0.0799582	0.0799582	0.139368	0.0269691
				1.75	0.0100865	0.043023	0.0542157	0.005	0.0100865	0.00875	0.043023	0.114298	0.0542157	0.0660756		1.75	0.0383765	0.077621	0.028793	0.00125	0.0383765	0.0021875	0.077621	0.077621	0.159065	0.028793
				2	0.00786926	0.0413751	0.0552637	0.005	0.00786926	0.01	0.0413751	0.124848	0.0552637	0.0797605		2	0.0363748	0.0752087	0.0300464	0.00125	0.0363748	0.0025	0.0752087	0.0752087	0.178169	0.0300464
				2.25	0.00607319	0.0389529	0.0563463	0.005	0.00607319	0.01125	0.0389529	0.134889	0.0563463	0.0937118		2.25	0.034375	0.0727646	0.0317927	0.00125	0.034375	0.0028125	0.0727646	0.0727646	0.196665	0.0317927
				2.5	0.0048444	0.0378927	0.0579972	0.005	0.0048444	0.0125	0.0378927	0.144494	0.0579972	0.108005		2.5	0.0327006	0.070634	0.0331949	0.00125	0.0327006	0.003125	0.070634	0.070634	0.21459	0.0331949
				2.75	0.00387393	0.0354036	0.0577631	0.005	0.00387393	0.01375	0.0354036	0.153656	0.0577631	0.122475		2.75	0.0309427	0.0687144	0.0347907	0.00125	0.0309427	0.0034375	0.0687144	0.0687144	0.232009	0.0347907
				3	0.00322119	0.0350726	0.05975	0.005	0.00322119	0.015	0.0350726	0.162466	0.05975	0.137164		3	0.0290826	0.0661125	0.0357988	0.00125	0.0290826	0.00375	0.0661125	0.0661125	0.248862	0.0357988
				3.25	0.00273947	0.0335916	0.0591677	0.005	0.00273947	0.01625	0.0335916	0.171049	0.0591677	0.152029		3.25	0.0275411	0.0642324	0.0372247	0.00125	0.0275411	0.0040625	0.0642324	0.0642324	0.265155	0.0372247
				3.5	0.00233462	0.0336715	0.0599135	0.005	0.00233462	0.0175	0.0336715	0.179457	0.0599135	0.166914		3.5	0.0259354	0.0617626	0.0385438	0.00125	0.0259354	0.004375	0.0617626	0.0617626	0.280905	0.0385438
				3.75	0.00205429	0.0334136	0.0601107	0.005	0.00205429	0.01875	0.0334136	0.187842	0.0601107	0.181917		3.75	0.0243457	0.0601566	0.039834	0.00125	0.0243457	0.0046875	0.0601566	0.0601566	0.296144	0.039834
				4	0.0018411	0.0328593	0.0594521	0.005	0.0018411	0.02	0.0328593	0.196127	0.0594521	0.196862		4	0.0227617	0.0582466	0.0412373	0.00125	0.0227617	0.005	0.0582466	0.0582466	0.310945	0.0412373
				4.25	0.00171577	0.0320987	0.0609076	0.005	0.00171577	0.02125	0.0320987	0.204246	0.0609076	0.211907		4.25	0.0213845	0.0562607	0.0423021	0.00125	0.0213845	0.0053125	0.0562607	0.0562607	0.325258	0.0423021
				4.5	0.00161523	0.0319121	0.0605998	0.005	0.00161523	0.0225	0.0319121	0.212248	0.0605998	0.227095		4.5	0.0199089	0.0545632	0.0433667	0.00125	0.0199089	0.005625	0.0545632	0.0545632	0.339111	0.0433667
				4.75	0.00158567	0.0315009	0.060715	0.005	0.00158567	0.02375	0.0315009	0.220174	0.060715	0.24226		4.75	0.0185897	0.0529147	0.0440633	0.00125	0.0185897	0.0059375	0.0529147	0.0529147	0.352546	0.0440633
				5.25	0.00155855	0.0314826	0.0605339	0.005	0.00155855	0.02625	0.0314826	0.23592	0.0605339	0.272572		5.25	0.0152351	0.0490667	0.0482224	0.00125	0.0152351	0.0065625	0.0490667	0.0490667	0.378041	0.0482224
				5.75	0.00153128	0.030202	0.0606364	0.005	0.00153128	0.02875	0.030202	0.251341	0.0606364	0.302865		5.75	0.0119843	0.0448814	0.0505859	0.00125	0.0119843	0.0071875	0.0448814	0.0448814	0.401528	0.0505859
				6.25	0.001483	0.0293212	0.0605259	0.005	0.001483	0.03125	0.0293212	0.266222	0.0605259	0.333155		6.25	0.0090353	0.0412728	0.0528185	0.00125	0.0090353	0.0078125	0.0412728	0.0412728	0.423067	0.0528185
				6.75	0.00154789	0.0290732	0.0615284	0.005	0.00154789	0.03375	0.0290732	0.280821	0.0615284	0.363669		6.75	0.00679475	0.0383645	0.0542318	0.00125	0.00679475	0.0084375	0.0383645	0.0383645	0.442976	0.0542318
				7.25	0.0015821	0.0286332	0.0617994	0.005	0.0015821	0.03625	0.0286332	0.295247	0.0617994	0.394501		7.25	0.00499641	0.0358829	0.0553086	0.00125	0.00499641	0.0090625	0.0358829	0.0358829	0.461538	0.0553086
																7.75	0.00380825	0.0339934	0.056285	0.00125	0.00380825	0.0096875	0.0339934	0.0339934	0.479007	0.056285
																8.25	0.00300098	0.0325063	0.0569344	0.00125	0.00300098	0.0103125	0.0325063	0.0325063	0.495632	0.0569344
																8.75	0.00245059	0.0314321	0.0572221	0.00125	0.00245059	0.0109375	0.0314321	0.0314321	0.511617	0.0572221
																9.25	0.00244904	0.0310315	0.0575746	0.00125	0.00244904	0.0115625	0.0310315	0.0310315	0.527233	0.0575746

## Sheet: Different excess in K2CO3
								Different excess in K2CO3
	iCLC Raw Data (peak area)											Concentration
	Std (0.6M K2CO3)				Decreased base (0.48M K2CO3)						Std (0.6M K2CO3)				Decreased base (0.48M K2CO3)				std-2				Decreased base (0.30M K2CO3)
time	Phenyl BPin	benzyl bromide	Product		BPin	Benzyl bromide	product			time	Phenyl BPin	benzyl bromide	Product		BPin	Benzyl bromide	product		BPin	Benzyl bromide	product		BPin	Benzyl bromide	product
0	2.22938	2.18604	0.0144489		2.31347	2.25001	0.0198991			0	0.0690703	0.108251	0.00100769		0.0716835	0.111296	0.00115796		0.071654	0.108316	0.00244158		0.0698977	0.107237	0.00053786
0.25	1.60232	1.8	0.720373		1.87916	1.85883	0.45527			0.25	0.0495842	0.0898754	0.0204707		0.058187	0.0926755	0.0131616		0.0472476	0.0868649	0.0220357		0.056496	0.0980095	0.00932502
0.5	1.17086	1.43046	1.13871		1.52602	1.63063	0.784037			0.5	0.0361765	0.0722847	0.0320047		0.0472132	0.0818133	0.022226		0.0338776	0.0701528	0.0332288		0.0475688	0.0912051	0.0150764
0.75	0.900086	1.26267	1.41415		1.28163	1.46267	1.00871			0.75	0.0277622	0.0642978	0.0395988		0.0396186	0.0738182	0.0284204		0.0252244	0.0606576	0.0409349		0.044451	0.0864978	0.0181443
1	0.712068	1.09321	1.61127		1.01126	1.27018	1.27452			1	0.0219194	0.0562317	0.0450337		0.031217	0.0646555	0.035749		0.0189221	0.0537114	0.0462213		0.0427034	0.0815329	0.0210221
1.25	0.543095	0.997409	1.74101		0.814832	1.12955	1.48142			1.25	0.0166686	0.0516712	0.0486107		0.0251129	0.0579611	0.0414534		0.0144558	0.048519	0.0503044		0.0403729	0.0790791	0.0233722
1.5	0.43191	0.903344	1.82666		0.662257	1.00829	1.64161			1.5	0.0132135	0.0471937	0.0509721		0.0203716	0.0521891	0.0458702		0.0110428	0.0444113	0.0531203		0.0384505	0.0769628	0.0252756
1.75	0.331284	0.815728	1.9443		0.540311	0.9271	1.74287			1.75	0.0100865	0.043023	0.0542157		0.0165821	0.0483244	0.0486619		0.0085147	0.04156	0.0552253		0.0362253	0.0750712	0.0270789
2	0.259933	0.781108	1.98231		0.434706	0.860362	1.83523			2	0.00786926	0.0413751	0.0552637		0.0133004	0.0451477	0.0512083		0.00669379	0.0393252	0.0569974		0.0349244	0.0719372	0.0286954
2.25	0.202135	0.730222	2.02158		0.357677	0.792085	1.91242			2.25	0.00607319	0.0389529	0.0563463		0.0109067	0.0418976	0.0533368		0.00519277	0.0372924	0.0576865		0.0330396	0.0703848	0.0299234
2.5	0.162593	0.707951	2.08146		0.303269	0.733487	1.9785			2.5	0.0048444	0.0378927	0.0579972		0.00921594	0.0391083	0.0551584		0.00413913	0.0359217	0.0587705		0.0327955	0.0698348	0.0315352
2.75	0.131363	0.65566	2.07297		0.244897	0.694977	2.01907			2.75	0.00387393	0.0354036	0.0577631		0.00740202	0.0372752	0.056277		0.00344848	0.0349141	0.0598534		0.0310073	0.0685418	0.0323182
3	0.110358	0.648705	2.14503		0.19709	0.661404	2.0559			3	0.00322119	0.0350726	0.05975		0.0059164	0.0356771	0.0572925		0.00290549	0.033961	0.0598248		0.0300566	0.0677345	0.0332956
3.25	0.0948561	0.617591	2.12391		0.162488	0.644397	2.06866			3.25	0.00273947	0.0335916	0.0591677		0.00484113	0.0348675	0.0576443		0.00253224	0.0334363	0.0603129		0.0292525	0.066343	0.0339134
3.5	0.081828	0.619272	2.15096		0.141406	0.617614	2.11219			3.5	0.00233462	0.0336715	0.0599135		0.004186	0.0335926	0.0588444		0.00223315	0.0327225	0.0603668		0.028597	0.0652535	0.0347517
3.75	0.0728072	0.613852	2.15812		0.12076	0.595607	2.12879			3.75	0.00205429	0.0334136	0.0601107		0.00354444	0.0325451	0.0593021		0.00196182	0.0322733	0.0605311		0.0281345	0.0637266	0.0353579
4	0.0659466	0.602209	2.13423		0.0996425	0.574576	2.16396			4	0.0018411	0.0328593	0.0594521		0.00288821	0.031544	0.0602719						0.027114	0.0634388	0.0358197
4.25	0.0619136	0.586229	2.18702
4.5	0.0586781	0.58231	2.17585
4.75	0.0577268	0.573671	2.18003
5.25	0.0568542	0.573287	2.17346
5.75	0.0559766	0.546385	2.17718
6.25	0.0544229	0.527881	2.17317
6.75	0.0565112	0.522669	2.20953
7.25	0.0576118	0.513425	2.21936
				Std Conditions (0.6M K2CO3)						VTNA						Decreased base (0.48M K2CO3)						VTNA
				Time	Bpin std	Bromide std	Product std	[K2CO3] std	[BPin] std	Norm Time K2CO3 std	[Bromide] std	Norm Time Bromide std	[Pdt] std	Norm Time Pdt std		Time	Bpin	Bromide	Product	[K2CO3]	[Bpin 195]	Norm Time K2CO3	[Bromide]	[Bromide] Adj	Norm Time Bromide	[Pdt]
				0	0.0690703	0.108251	0.00100769	0.6	0.0690703	0	0.108251	0	0.00100769	0		0	0.0716835	0.111296	0.00115796	0.48	0.0716835	0	0.111296	0.111296	0	0.00115796
				0.25	0.0495842	0.0898754	0.0204707	0.580514	0.0495842	0.125978	0.0898754	0.0123773	0.0204707	0.000688976		0.25	0.058187	0.0926755	0.0131616	0.466503	0.058187	0.0945279	0.0926755	0.0926755	0.0128541	0.0131616
				0.5	0.0361765	0.0722847	0.0320047	0.567106	0.0361765	0.247411	0.0722847	0.0219169	0.0320047	0.00288959		0.5	0.0472132	0.0818133	0.022226	0.45553	0.0472132	0.185891	0.0818133	0.0818133	0.0233471	0.022226
ORDER IN K2CO3		1.3		0.75	0.0277622	0.0642978	0.0395988	0.558692	0.0277622	0.365852	0.0642978	0.0295484	0.0395988	0.0061858		0.75	0.0396186	0.0738182	0.0284204	0.447935	0.0396186	0.27487	0.0738182	0.0738182	0.0323904	0.0284204
				1	0.0219194	0.0562317	0.0450337	0.552849	0.0219194	0.482346	0.0562317	0.0360351	0.0450337	0.0102822		1	0.031217	0.0646555	0.035749	0.439533	0.031217	0.361806	0.0646555	0.0646555	0.0401596	0.035749
				1.25	0.0166686	0.0516712	0.0486107	0.547598	0.0166686	0.597331	0.0516712	0.0416526	0.0486107	0.0149544		1.25	0.0251129	0.0579611	0.0414534	0.433429	0.0251129	0.446899	0.0579611	0.0579611	0.0467927	0.0414534
				1.5	0.0132135	0.0471937	0.0509721	0.544143	0.0132135	0.711135	0.0471937	0.0466663	0.0509721	0.0200155		1.5	0.0203716	0.0521891	0.0458702	0.428688	0.0203716	0.530621	0.0521891	0.0521891	0.0525628	0.0458702
				1.75	0.0100865	0.043023	0.0542157	0.541016	0.0100865	0.824047	0.043023	0.0511175	0.0542157	0.0254499		1.75	0.0165821	0.0483244	0.0486619	0.424899	0.0165821	0.613267	0.0483244	0.0483244	0.0576854	0.0486619
				2	0.00786926	0.0413751	0.0552637	0.538799	0.00786926	0.936237	0.0413751	0.0551991	0.0552637	0.0311744		2	0.0133004	0.0451477	0.0512083	0.421617	0.0133004	0.695024	0.0451477	0.0451477	0.0623465	0.0512083
				2.25	0.00607319	0.0389529	0.0563463	0.537003	0.00607319	1.04789	0.0389529	0.0590267	0.0563463	0.0370441		2.25	0.0109067	0.0418976	0.0533368	0.419223	0.0109067	0.77607	0.0418976	0.0418976	0.0665953	0.0533368
				2.5	0.0048444	0.0378927	0.0579972	0.535774	0.0048444	1.15913	0.0378927	0.06264	0.0579972	0.0431013		2.5	0.00921594	0.0391083	0.0551584	0.417532	0.00921594	0.856604	0.0391083	0.0391083	0.070465	0.0551584
				2.75	0.00387393	0.0354036	0.0577631	0.534804	0.00387393	1.27007	0.0354036	0.0660379	0.0577631	0.0492563		2.75	0.00740202	0.0372752	0.056277	0.415719	0.00740202	0.936699	0.0372752	0.0372752	0.0740501	0.056277
				3	0.00322119	0.0350726	0.05975	0.534151	0.00322119	1.3808	0.0350726	0.0692668	0.05975	0.0555328		3	0.0059164	0.0356771	0.0572925	0.414233	0.0059164	1.01638	0.0356771	0.0356771	0.0774272	0.0572925
				3.25	0.00273947	0.0335916	0.0591677	0.533669	0.00273947	1.49137	0.0335916	0.0723882	0.0591677	0.0619069		3.25	0.00484113	0.0348675	0.0576443	0.413158	0.00484113	1.09575	0.0348675	0.0348675	0.0806602	0.0576443
				3.5	0.00233462	0.0336715	0.0599135	0.533264	0.00233462	1.60182	0.0336715	0.0754271	0.0599135	0.0682924		3.5	0.004186	0.0335926	0.0588444	0.412503	0.004186	1.1749	0.0335926	0.0335926	0.0837696	0.0588444
				3.75	0.00205429	0.0334136	0.0601107	0.532984	0.00205429	1.71218	0.0334136	0.0784555	0.0601107	0.0747438		3.75	0.00354444	0.0325451	0.0593021	0.411861	0.00354444	1.25388	0.0325451	0.0325451	0.0867425	0.0593021
				4	0.0018411	0.0328593	0.0594521	0.532771	0.0018411	1.82248	0.0328593	0.0814363	0.0594521	0.0811629		4	0.00288821	0.031544	0.0602719	0.411205	0.00288821	1.33271	0.031544	0.031544	0.0895963	0.0602719
				4.25	0.00171577	0.0320987	0.0609076	0.532646	0.00171577	1.93273	0.0320987	0.0843405	0.0609076	0.0876377
				4.5	0.00161523	0.0319121	0.0605998	0.532545	0.00161523	2.04295	0.0319121	0.0871898	0.0605998	0.0941929
				4.75	0.00158567	0.0315009	0.060715	0.532515	0.00158567	2.15315	0.0315009	0.0900045	0.060715	0.100735
				5.25	0.00155855	0.0314826	0.0605339	0.532488	0.00155855	2.37354	0.0314826	0.0955844	0.0605339	0.113809
				5.75	0.00153128	0.030202	0.0606364	0.532461	0.00153128	2.59391	0.030202	0.101015	0.0606364	0.126872
				6.25	0.001483	0.0293212	0.0605259	0.532413	0.001483	2.81426	0.0293212	0.1062	0.0605259	0.139934
				6.75	0.00154789	0.0290732	0.0615284	0.532478	0.00154789	3.03462	0.0290732	0.111257	0.0615284	0.153121
				7.25	0.0015821	0.0286332	0.0617994	0.532512	0.0015821	3.255	0.0286332	0.116237	0.0617994	0.166487
	iCLC Raw Data (peak area)											Concentration
	Std (0.6M K2CO3)				Decreased base (0.30M K2CO3)						Std (0.6M K2CO3)				Decreased base (0.30M K2CO3)
time	Phenyl BPin	benzyl bromide	Product		BPin	Benzyl bromide	product			time	Phenyl BPin	benzyl bromide	Product		BPin	Benzyl bromide	product
0	2.22938	2.18604	0.0144489		2.25601	2.16473	-0.00259181			0	0.0690703	0.108251	0.00100769		0.0698977	0.107237	0.00053786
0.25	1.60232	1.8	0.720373		1.82474	1.97088	0.316118			0.25	0.0495842	0.0898754	0.0204707		0.056496	0.0980095	0.00932502
0.5	1.17086	1.43046	1.13871		1.53747	1.82794	0.524719			0.5	0.0361765	0.0722847	0.0320047		0.0475688	0.0912051	0.0150764
0.75	0.900086	1.26267	1.41415		1.43713	1.72905	0.635995			0.75	0.0277622	0.0642978	0.0395988		0.044451	0.0864978	0.0181443
1	0.712068	1.09321	1.61127		1.38089	1.62474	0.740372			1	0.0219194	0.0562317	0.0450337		0.0427034	0.0815329	0.0210221
1.25	0.543095	0.997409	1.74101		1.3059	1.57319	0.82561			1.25	0.0166686	0.0516712	0.0486107		0.0403729	0.0790791	0.0233722
1.5	0.43191	0.903344	1.82666		1.24404	1.52873	0.894646			1.5	0.0132135	0.0471937	0.0509721		0.0384505	0.0769628	0.0252756
1.75	0.331284	0.815728	1.9443		1.17243	1.489	0.960053			1.75	0.0100865	0.043023	0.0542157		0.0362253	0.0750712	0.0270789
2	0.259933	0.781108	1.98231		1.13057	1.42316	1.01868			2	0.00786926	0.0413751	0.0552637		0.0349244	0.0719372	0.0286954
2.25	0.202135	0.730222	2.02158		1.06991	1.39054	1.06322			2.25	0.00607319	0.0389529	0.0563463		0.0330396	0.0703848	0.0299234
2.5	0.162593	0.707951	2.08146		1.06206	1.37899	1.12168			2.5	0.0048444	0.0378927	0.0579972		0.0327955	0.0698348	0.0315352
2.75	0.131363	0.65566	2.07297		1.00451	1.35183	1.15008			2.75	0.00387393	0.0354036	0.0577631		0.0310073	0.0685418	0.0323182
3	0.110358	0.648705	2.14503		0.973923	1.33487	1.18553			3	0.00322119	0.0350726	0.05975		0.0300566	0.0677345	0.0332956
3.25	0.0948561	0.617591	2.12391		0.948046	1.30563	1.20794			3.25	0.00273947	0.0335916	0.0591677		0.0292525	0.066343	0.0339134
3.5	0.081828	0.619272	2.15096		0.926953	1.28275	1.23835			3.5	0.00233462	0.0336715	0.0599135		0.028597	0.0652535	0.0347517
3.75	0.0728072	0.613852	2.15812		0.912069	1.25067	1.26033			3.75	0.00205429	0.0334136	0.0601107		0.0281345	0.0637266	0.0353579
4	0.0659466	0.602209	2.13423		0.879227	1.24462	1.27708			4	0.0018411	0.0328593	0.0594521		0.027114	0.0634388	0.0358197
4.25	0.0619136	0.586229	2.18702		0.867123	1.21947	1.30987
4.5	0.0586781	0.58231	2.17585		0.822885	1.18306	1.33101
4.75	0.0577268	0.573671	2.18003		0.823046	1.16536	1.35553
5.25	0.0568542	0.573287	2.17346		0.785796	1.15014	1.37676
5.75	0.0559766	0.546385	2.17718
6.25	0.0544229	0.527881	2.17317
6.75	0.0565112	0.522669	2.20953
7.25	0.0576118	0.513425	2.21936
				Std Conditions (0.6M K2CO3)						VTNA						Decreased base (0.30M K2CO3)						VTNA
				Time	Bpin std	Bromide std	Product std	[K2CO3] std	[BPin] std	Norm Time K2CO3 std	[Bromide] std	Norm Time Bromide std	[Pdt] std	Norm Time Pdt std		Time	Bpin	Bromide	Product	[K2CO3]	[Bpin 195]	Norm Time K2CO3	[Bromide]	[Bromide] Adj	Norm Time Bromide	[Pdt]
				0	0.0690703	0.108251	0.00100769	0.6	0.0690703	0	0.108251	0	0.00100769	0		0	0.0698977	0.107237	0.00053786	0.3	0.0698977	0	0.107237	0.107237	0	0.00053786
				0.25	0.0495842	0.0898754	0.0204707	0.580514	0.0495842	0.0967863	0.0898754	0.0123773	0.0204707	0.000688976		0.25	0.056496	0.0980095	0.00932502	0.284813	0.056496	0.0273348	0.0980095	0.0980095	0.0129586	0.00932502
				0.5	0.0361765	0.0722847	0.0320047	0.567106	0.0361765	0.188773	0.0722847	0.0219169	0.0320047	0.00288959		0.5	0.0475688	0.0912051	0.0150764	0.275885	0.0475688	0.0526743	0.0912051	0.0912051	0.0246171	0.0150764
ORDER IN K2CO3		1.8		0.75	0.0277622	0.0642978	0.0395988	0.558692	0.0277622	0.277634	0.0642978	0.0295484	0.0395988	0.0061858		0.75	0.044451	0.0864978	0.0181443	0.272768	0.044451	0.0770424	0.0864978	0.0864978	0.035362	0.0181443
				1	0.0219194	0.0562317	0.0450337	0.552849	0.0219194	0.364481	0.0562317	0.0360351	0.0450337	0.0102822		1	0.0427034	0.0815329	0.0210221	0.27102	0.0427034	0.101023	0.0815329	0.0815329	0.045353	0.0210221
				1.25	0.0166686	0.0516712	0.0486107	0.547598	0.0166686	0.449773	0.0516712	0.0416526	0.0486107	0.0149544		1.25	0.0403729	0.0790791	0.0233722	0.268689	0.0403729	0.124681	0.0790791	0.0790791	0.0547743	0.0233722
				1.5	0.0132135	0.0471937	0.0509721	0.544143	0.0132135	0.533855	0.0471937	0.0466663	0.0509721	0.0200155		1.5	0.0384505	0.0769628	0.0252756	0.266767	0.0384505	0.148004	0.0769628	0.0769628	0.0638486	0.0252756
				1.75	0.0100865	0.043023	0.0542157	0.541016	0.0100865	0.617026	0.043023	0.0511175	0.0542157	0.0254499		1.75	0.0362253	0.0750712	0.0270789	0.264542	0.0362253	0.171003	0.0750712	0.0750712	0.0726212	0.0270789
				2	0.00786926	0.0413751	0.0552637	0.538799	0.00786926	0.699462	0.0413751	0.0551991	0.0552637	0.0311744		2	0.0349244	0.0719372	0.0286954	0.263241	0.0349244	0.193728	0.0719372	0.0719372	0.0810186	0.0286954
				2.25	0.00607319	0.0389529	0.0563463	0.537003	0.00607319	0.781347	0.0389529	0.0590267	0.0563463	0.0370441		2.25	0.0330396	0.0703848	0.0299234	0.261356	0.0330396	0.216207	0.0703848	0.0703848	0.0890697	0.0299234
				2.5	0.0048444	0.0378927	0.0579972	0.535774	0.0048444	0.862818	0.0378927	0.06264	0.0579972	0.0431013		2.5	0.0327955	0.0698348	0.0315352	0.261112	0.0327955	0.238522	0.0698348	0.0698348	0.0969665	0.0315352
				2.75	0.00387393	0.0354036	0.0577631	0.534804	0.00387393	0.943989	0.0354036	0.0660379	0.0577631	0.0492563		2.75	0.0310073	0.0685418	0.0323182	0.259324	0.0310073	0.260681	0.0685418	0.0685418	0.104729	0.0323182
				3	0.00322119	0.0350726	0.05975	0.534151	0.00322119	1.02494	0.0350726	0.0692668	0.05975	0.0555328		3	0.0300566	0.0677345	0.0332956	0.258373	0.0300566	0.28263	0.0677345	0.0677345	0.112338	0.0332956
				3.25	0.00273947	0.0335916	0.0591677	0.533669	0.00273947	1.10573	0.0335916	0.0723882	0.0591677	0.0619069		3.25	0.0292525	0.066343	0.0339134	0.257569	0.0292525	0.304446	0.066343	0.066343	0.119788	0.0339134
				3.5	0.00233462	0.0336715	0.0599135	0.533264	0.00233462	1.18641	0.0336715	0.0754271	0.0599135	0.0682924		3.5	0.028597	0.0652535	0.0347517	0.256914	0.028597	0.32615	0.0652535	0.0652535	0.12706	0.0347517
				3.75	0.00205429	0.0334136	0.0601107	0.532984	0.00205429	1.26699	0.0334136	0.0784555	0.0601107	0.0747438		3.75	0.0281345	0.0637266	0.0353579	0.256451	0.0281345	0.34777	0.0637266	0.0637266	0.134144	0.0353579
				4	0.0018411	0.0328593	0.0594521	0.532771	0.0018411	1.3475	0.0328593	0.0814363	0.0594521	0.0811629		4	0.027114	0.0634388	0.0358197	0.25543	0.027114	0.369278	0.0634388	0.0634388	0.141098	0.0358197
				4.25	0.00171577	0.0320987	0.0609076	0.532646	0.00171577	1.42797	0.0320987	0.0843405	0.0609076	0.0876377
				4.5	0.00161523	0.0319121	0.0605998	0.532545	0.00161523	1.50841	0.0319121	0.0871898	0.0605998	0.0941929
				4.75	0.00158567	0.0315009	0.060715	0.532515	0.00158567	1.58882	0.0315009	0.0900045	0.060715	0.100735
				5.25	0.00155855	0.0314826	0.0605339	0.532488	0.00155855	1.74965	0.0314826	0.0955844	0.0605339	0.113809
				5.75	0.00153128	0.030202	0.0606364	0.532461	0.00153128	1.91046	0.030202	0.101015	0.0606364	0.126872
				6.25	0.001483	0.0293212	0.0605259	0.532413	0.001483	2.07124	0.0293212	0.1062	0.0605259	0.139934
				6.75	0.00154789	0.0290732	0.0615284	0.532478	0.00154789	2.23204	0.0290732	0.111257	0.0615284	0.153121
				7.25	0.0015821	0.0286332	0.0617994	0.532512	0.0015821	2.39285	0.0286332	0.116237	0.0617994	0.166487

## Sheet: Different excess in KBr
								Different excess in KBr
	iCLC Raw Data (peak area)											Concentration
	std (w/o KBr)				0.1M KBr						std				0.1 M KBr
time	Phenyl BPin	benzyl bromide	Product		BPin	Benzyl bromide	product			time	Phenyl BPin	benzyl bromide	Product		BPin	Benzyl bromide	product
0	2.22938	2.18604	0.0144489		2.22632	2.17547	0.0160385			0	0.0690703	0.108251	0.00100769		0.068975	0.107748	0.00105152
0.25	1.60232	1.8	0.720373		2.00431	2.01594	0.0457933			0.25	0.0495842	0.0898754	0.0204707		0.062076	0.100154	0.00187189
0.5	1.17086	1.43046	1.13871		1.82216	1.88629	0.244846			0.5	0.0361765	0.0722847	0.0320047		0.0564158	0.0939827	0.00735996
0.75	0.900086	1.26267	1.41415		1.70106	1.80782	0.415143			0.75	0.0277622	0.0642978	0.0395988		0.0526526	0.0902476	0.0120552
1	0.712068	1.09321	1.61127		1.59608	1.73446	0.552955			1	0.0219194	0.0562317	0.0450337		0.0493902	0.0867555	0.0158548
1.25	0.543095	0.997409	1.74101		1.49059	1.66597	0.67008			1.25	0.0166686	0.0516712	0.0486107		0.0461123	0.0834955	0.0190841
1.5	0.43191	0.903344	1.82666		1.38835	1.58365	0.776812			1.5	0.0132135	0.0471937	0.0509721		0.0429351	0.0795767	0.0220268
1.75	0.331284	0.815728	1.9443		1.29797	1.51371	0.875151			1.75	0.0100865	0.043023	0.0542157		0.0401264	0.0762478	0.0247381
2	0.259933	0.781108	1.98231		1.21455	1.45593	0.958942			2	0.00786926	0.0413751	0.0552637		0.0375342	0.0734973	0.0270483
2.25	0.202135	0.730222	2.02158		1.1386	1.40441	1.03902			2.25	0.00607319	0.0389529	0.0563463		0.0351741	0.0710447	0.0292561
2.5	0.162593	0.707951	2.08146		1.08143	1.34884	1.12306			2.5	0.0048444	0.0378927	0.0579972		0.0333974	0.0683995	0.0315733
2.75	0.131363	0.65566	2.07297		1.00795	1.28972	1.18332			2.75	0.00387393	0.0354036	0.0577631		0.0311141	0.0655855	0.0332347
3	0.110358	0.648705	2.14503		0.945394	1.23597	1.25139			3	0.00322119	0.0350726	0.05975		0.0291701	0.0630271	0.0351114
3.25	0.0948561	0.617591	2.12391		0.874676	1.19039	1.30375			3.25	0.00273947	0.0335916	0.0591677		0.0269725	0.0608574	0.0365549
3.5	0.081828	0.619272	2.15096		0.816041	1.14262	1.36673			3.5	0.00233462	0.0336715	0.0599135		0.0251504	0.0585834	0.0382916
3.75	0.0728072	0.613852	2.15812		0.755331	1.09334	1.41689			3.75	0.00205429	0.0334136	0.0601107		0.0232639	0.0562377	0.0396744
4	0.0659466	0.602209	2.13423		0.700487	1.05152	1.46102			4	0.0018411	0.0328593	0.0594521		0.0215596	0.0542469	0.0408912
4.25	0.0619136	0.586229	2.18702		0.645595	1.00211	1.51653			4.25	0.00171577	0.0320987	0.0609076		0.0198538	0.0518949	0.0424215
4.5	0.0586781	0.58231	2.17585		0.591448	0.965941	1.54639			4.5	0.00161523	0.0319121	0.0605998		0.0181711	0.0501733	0.0432449
4.75	0.0577268	0.573671	2.18003		0.543794	0.925581	1.60231			4.75	0.00158567	0.0315009	0.060715		0.0166903	0.0482521	0.0447866
5.25	0.0568542	0.573287	2.17346		0.449913	0.848031	1.6901			5.25	0.00155855	0.0314826	0.0605339		0.0137729	0.0445607	0.047207
5.75	0.0559766	0.546385	2.17718		0.370564	0.783592	1.74873			5.75	0.00153128	0.030202	0.0606364		0.0113071	0.0414933	0.0488235
6.25	0.0544229	0.527881	2.17317		0.297595	0.717445	1.81911			6.25	0.001483	0.0293212	0.0605259		0.00903961	0.0383447	0.050764
6.75	0.0565112	0.522669	2.20953		0.237817	0.648561	1.90024			6.75	0.00154789	0.0290732	0.0615284		0.00718201	0.0350657	0.0530007
7.25	0.0576118	0.513425	2.21936		0.17809	0.615261	1.91014			7.25	0.0015821	0.0286332	0.0617994		0.00532599	0.0334806	0.0532737
7.75					0.138462	0.561005	1.91084								0.00409452	0.030898	0.053293
8.25					0.106844	0.554885	1.91471								0.00311199	0.0306067	0.0533997
8.75					0.0868848	0.522099	1.95254								0.00249176	0.029046	0.0544427
9.25					0.0780884	0.506685	1.989								0.00221841	0.0283123	0.0554481
9.75					0.0735146	0.486447	1.98918								0.00207628	0.027349	0.0554531
10.25					0.0769413	0.483546	1.98928								0.00218276	0.0272109	0.0554559
10.75					0.0746686	0.481842	1.98956								0.00211214	0.0271298	0.0554635
11.25					0.0757918	0.468443	1.98978								0.00214704	0.0264919	0.0554696
11.75					0.075236	0.462226	1.98963								0.00212977	0.026196	0.0554653
12.25					0.0734627	0.449247	1.99158								0.00207466	0.0255782	0.0555192
12.75					0.074124	0.439239	1.99314								0.00209521	0.0251018	0.0555621
13.25					0.0760631	0.430677	1.99983								0.00215547	0.0246942	0.0557465
13.75					0.0743875	0.413081	1.99713								0.0021034	0.0238567	0.0556723
14.25					0.0753524	0.411698	1.99176								0.00213339	0.0237908	0.0555242
14.75					0.0736856	0.395107	2.00658								0.00208159	0.0230011	0.0559327
				Std Conditions w/o KBr						VTNA						0.1M KBr						VTNA
				Time	Bpin std	Bromide std	Product std	KBr std	[BPin] std	Norm Time KBr std	[Bromide] std	Norm Time Bromide std	[Pdt] std	Norm Time Pdt std		Time	Bpin 195	Bromide 195	Product 195	KBr 195	[Bpin 195]	Norm Time KBr 195	[Bromide] 195	[Bromide] Adj 195	Norm Time Bromide 195	[Pdt] 195
				0	0.0690703	0.108251	0.00100769	0	0.0690703	0	0.108251	0	0.00100769	0		0	0.068975	0.107748	0.00105152	0.1	0.068975	0	0.107748	0.107748	0	0.00105152
				0.25	0.0495842	0.0898754	0.0204707	0.0183757	0.0495842	10.6505	0.0898754	1.58932	0.0204707	9.40075		0.25	0.062076	0.100154	0.00187189	0.102834	0.062076	1.55974	0.100154	0.100154	1.52925	0.00187189
				0.5	0.0361765	0.0722847	0.0320047	0.0359664	0.0361765	15.124	0.0722847	3.45487	0.0320047	14.0012		0.5	0.0564158	0.0939827	0.00735996	0.109005	0.0564158	3.06621	0.0939827	0.0939827	3.14464	0.00735996
ORDER IN KBR		-0.8		0.75	0.0277622	0.0642978	0.0395988	0.0439533	0.0277622	18.4098	0.0642978	5.59504	0.0395988	17.5889		0.75	0.0526526	0.0902476	0.0120552	0.11274	0.0526526	4.51859	0.0902476	0.0902476	4.82915	0.0120552
				1	0.0219194	0.0562317	0.0450337	0.0520194	0.0219194	21.2481	0.0562317	7.96036	0.0450337	20.7275		1	0.0493902	0.0867555	0.0158548	0.116232	0.0493902	5.93418	0.0867555	0.0867555	6.56847	0.0158548
				1.25	0.0166686	0.0516712	0.0486107	0.0565799	0.0166686	23.8191	0.0516712	10.5446	0.0486107	23.622		1.25	0.0461123	0.0834955	0.0190841	0.119492	0.0461123	7.31724	0.0834955	0.0834955	8.36276	0.0190841
				1.5	0.0132135	0.0471937	0.0509721	0.0610574	0.0132135	26.2308	0.0471937	13.3162	0.0509721	26.3776		1.5	0.0429351	0.0795767	0.0220268	0.123411	0.0429351	8.6675	0.0795767	0.0795767	10.22	0.0220268
				1.75	0.0100865	0.043023	0.0542157	0.065228	0.0100865	28.5095	0.043023	16.2984	0.0542157	29.0151		1.75	0.0401264	0.0762478	0.0247381	0.12674	0.0401264	9.98637	0.0762478	0.0762478	12.146	0.0247381
				2	0.00786926	0.0413751	0.0552637	0.066876	0.00786926	30.7075	0.0413751	19.444	0.0552637	31.5696		2	0.0375342	0.0734973	0.0270483	0.12949	0.0375342	11.2801	0.0734973	0.0734973	14.1343	0.0270483
				2.25	0.00607319	0.0389529	0.0563463	0.0692982	0.00607319	32.8528	0.0389529	22.7164	0.0563463	34.0849		2.25	0.0351741	0.0710447	0.0292561	0.131943	0.0351741	12.5533	0.0710447	0.0710447	16.1796	0.0292561
				2.5	0.0048444	0.0378927	0.0579972	0.0703583	0.0048444	34.9552	0.0378927	26.1069	0.0579972	36.5521		2.5	0.0333974	0.0683995	0.0315733	0.134588	0.0333974	13.8069	0.0683995	0.0683995	18.2846	0.0315733
				2.75	0.00387393	0.0354036	0.0577631	0.0728474	0.00387393	37.0158	0.0354036	29.6282	0.0577631	38.995		2.75	0.0311141	0.0655855	0.0332347	0.137402	0.0311141	15.0404	0.0655855	0.0655855	20.4579	0.0332347
				3	0.00322119	0.0350726	0.05975	0.0731785	0.00322119	39.0445	0.0350726	33.2617	0.05975	41.4088		3	0.0291701	0.0630271	0.0351114	0.139961	0.0291701	16.2547	0.0630271	0.0630271	22.7035	0.0351114
				3.25	0.00273947	0.0335916	0.0591677	0.0746595	0.00273947	41.0533	0.0335916	36.9718	0.0591677	43.7997		3.25	0.0269725	0.0608574	0.0365549	0.14213	0.0269725	17.4526	0.0608574	0.0608574	25.0174	0.0365549
				3.5	0.00233462	0.0336715	0.0599135	0.0745795	0.00233462	43.047	0.0336715	40.7435	0.0599135	46.188		3.5	0.0251504	0.0585834	0.0382916	0.144404	0.0251504	18.6357	0.0585834	0.0585834	27.4	0.0382916
				3.75	0.00205429	0.0334136	0.0601107	0.0748375	0.00205429	45.0388	0.0334136	44.5233	0.0601107	48.5613		3.75	0.0232639	0.0562377	0.0396744	0.14675	0.0232639	19.8038	0.0562377	0.0562377	29.8589	0.0396744
				4	0.0018411	0.0328593	0.0594521	0.0753917	0.0018411	47.0219	0.0328593	48.3401	0.0594521	50.9419		4	0.0215596	0.0542469	0.0408912	0.148741	0.0215596	20.9581	0.0542469	0.0542469	32.3948	0.0408912
				4.25	0.00171577	0.0320987	0.0609076	0.0761524	0.00171577	48.9913	0.0320987	52.2185	0.0609076	53.3099		4.25	0.0198538	0.0518949	0.0424215	0.151093	0.0198538	22.0991	0.0518949	0.0518949	35.0133	0.0424215
				4.5	0.00161523	0.0319121	0.0605998	0.076339	0.00161523	50.9509	0.0319121	56.1428	0.0605998	55.66		4.5	0.0181711	0.0501733	0.0432449	0.152814	0.0181711	23.2277	0.0501733	0.0501733	37.7151	0.0432449
				4.75	0.00158567	0.0315009	0.060715	0.0767502	0.00158567	52.9044	0.0315009	60.0967	0.060715	58.013		4.75	0.0166903	0.0482521	0.0447866	0.154736	0.0166903	24.3457	0.0482521	0.0482521	40.4966	0.0447866
				5.25	0.00155855	0.0314826	0.0605339	0.0767684	0.00155855	56.8026	0.0314826	68.0475	0.0605339	62.7212		5.25	0.0137729	0.0445607	0.047207	0.158427	0.0137729	26.5495	0.0445607	0.0445607	46.3271	0.047207
				5.75	0.00153128	0.030202	0.0606364	0.078049	0.00153128	60.6746	0.030202	76.132	0.0606364	67.4318		5.75	0.0113071	0.0414933	0.0488235	0.161494	0.0113071	28.7161	0.0414933	0.0414933	52.5212	0.0488235
				6.25	0.001483	0.0293212	0.0605259	0.0789298	0.001483	64.504	0.0293212	84.4504	0.0605259	72.1427		6.25	0.00903961	0.0383447	0.050764	0.164643	0.00903961	30.8495	0.0383447	0.0383447	59.0981	0.050764
				6.75	0.00154789	0.0290732	0.0615284	0.0791779	0.00154789	68.3114	0.0290732	92.8973	0.0615284	76.826		6.75	0.00718201	0.0350657	0.0530007	0.167922	0.00718201	32.9498	0.0350657	0.0350657	66.1319	0.0530007
				7.25	0.0015821	0.0286332	0.0617994	0.0796179	0.0015821	72.1056	0.0286332	101.425	0.0617994	81.4705		7.25	0.00532599	0.0334806	0.0532737	0.169507	0.00532599	35.0259	0.0334806	0.0334806	73.5622	0.0532737
																7.75	0.00409452	0.030898	0.053293	0.17209	0.00409452	37.0817	0.030898	0.030898	81.3749	0.053293
																8.25	0.00311199	0.0306067	0.0533997	0.172381	0.00311199	39.1238	0.0306067	0.0306067	89.4783	0.0533997
																8.75	0.00249176	0.029046	0.0544427	0.173942	0.00249176	41.1571	0.029046	0.029046	97.7824	0.0544427
																9.25	0.00221841	0.0283123	0.0554481	0.174675	0.00221841	43.1798	0.0283123	0.0283123	106.351	0.0554481
																9.75	0.00207628	0.027349	0.0554531	0.175639	0.00207628	45.1945	0.027349	0.027349	115.128	0.0554531
																10.25	0.00218276	0.0272109	0.0554559	0.175777	0.00218276	47.2043	0.0272109	0.0272109	124.047	0.0554559
																10.75	0.00211214	0.0271298	0.0554635	0.175858	0.00211214	49.213	0.0271298	0.0271298	132.994	0.0554635
																11.25	0.00214704	0.0264919	0.0554696	0.176496	0.00214704	51.2184	0.0264919	0.0264919	142.037	0.0554696
																11.75	0.00212977	0.026196	0.0554653	0.176792	0.00212977	53.2196	0.026196	0.026196	151.208	0.0554653
																12.25	0.00207466	0.0255782	0.0555192	0.177409	0.00207466	55.2167	0.0255782	0.0255782	160.509	0.0555192
																12.75	0.00209521	0.0251018	0.0555621	0.177886	0.00209521	57.2089	0.0251018	0.0251018	169.97	0.0555621
																13.25	0.00215547	0.0246942	0.0557465	0.178293	0.00215547	59.1971	0.0246942	0.0246942	179.564	0.0557465
																13.75	0.0021034	0.0238567	0.0556723	0.179131	0.0021034	61.1797	0.0238567	0.0238567	189.356	0.0556723
																14.25	0.00213339	0.0237908	0.0555242	0.179197	0.00213339	63.1584	0.0237908	0.0237908	199.295	0.0555242
																14.75	0.00208159	0.0230011	0.0559327	0.179987	0.00208159	65.1332	0.0230011	0.0230011	209.38	0.0559327
	iCLC Raw Data (peak area)											Concentration
	std (w/o KBr)				0.05M KBr						std				0.05M KBr
time	Phenyl BPin	benzyl bromide	Product		BPin	Benzyl bromide	product			time	Phenyl BPin	benzyl bromide	Product		BPin	Benzyl bromide	product
0	2.22938	2.18604	0.0144489		2.22333	2.17929	0.0570058			0	0.0690703	0.108251	0.00100769		0.0688823	0.10793	0.00218102
0.25	1.60232	1.8	0.720373		2.147	2.03733	0.0971978			0.25	0.0495842	0.0898754	0.0204707		0.0665104	0.101172	0.00328916
0.5	1.17086	1.43046	1.13871		2.01181	1.87338	0.294382			0.5	0.0361765	0.0722847	0.0320047		0.0623093	0.0933682	0.00872572
0.75	0.900086	1.26267	1.41415		1.76427	1.68759	0.509784			0.75	0.0277622	0.0642978	0.0395988		0.0546167	0.0845243	0.0146646
1	0.712068	1.09321	1.61127		1.58257	1.5535	0.698718			1	0.0219194	0.0562317	0.0450337		0.0489704	0.0781416	0.0198737
1.25	0.543095	0.997409	1.74101		1.42794	1.42538	0.870228			1.25	0.0166686	0.0516712	0.0486107		0.0441653	0.0720431	0.0246024
1.5	0.43191	0.903344	1.82666		1.3091	1.33325	1.02339			1.5	0.0132135	0.0471937	0.0509721		0.0404723	0.0676575	0.0288252
1.75	0.331284	0.815728	1.9443		1.16541	1.24091	1.14695			1.75	0.0100865	0.043023	0.0542157		0.036007	0.0632621	0.0322319
2	0.259933	0.781108	1.98231		1.04006	1.16761	1.24256			2	0.00786926	0.0413751	0.0552637		0.0321117	0.059773	0.0348679
2.25	0.202135	0.730222	2.02158		0.936288	1.09389	1.35428			2.25	0.00607319	0.0389529	0.0563463		0.0288871	0.0562639	0.0379482
2.5	0.162593	0.707951	2.08146		0.827676	1.0366	1.43807			2.5	0.0048444	0.0378927	0.0579972		0.025512	0.0535368	0.0402583
2.75	0.131363	0.65566	2.07297		0.742701	0.994405	1.5107			2.75	0.00387393	0.0354036	0.0577631		0.0228714	0.0515282	0.0422608
3	0.110358	0.648705	2.14503		0.660975	0.947464	1.59026			3	0.00322119	0.0350726	0.05975		0.0203317	0.0492938	0.0444543
3.25	0.0948561	0.617591	2.12391		0.596715	0.892737	1.66872			3.25	0.00273947	0.0335916	0.0591677		0.0183348	0.0466887	0.0466176
3.5	0.081828	0.619272	2.15096		0.538817	0.850857	1.719			3.5	0.00233462	0.0336715	0.0599135		0.0165356	0.0446952	0.0480038
3.75	0.0728072	0.613852	2.15812		0.481765	0.818953	1.76396			3.75	0.00205429	0.0334136	0.0601107		0.0147627	0.0431766	0.0492434
4	0.0659466	0.602209	2.13423		0.424606	0.784437	1.80452			4	0.0018411	0.0328593	0.0594521		0.0129865	0.0415336	0.0503618
4.25	0.0619136	0.586229	2.18702		0.379551	0.736285	1.84909			4.25	0.00171577	0.0320987	0.0609076		0.0115864	0.0392415	0.0515906
4.5	0.0586781	0.58231	2.17585		0.338924	0.714	1.89238			4.5	0.00161523	0.0319121	0.0605998		0.0103239	0.0381807	0.0527842
4.75	0.0577268	0.573671	2.18003		0.302586	0.629813	1.9359			4.75	0.00158567	0.0315009	0.060715		0.00919472	0.0341733	0.0539841
5.25	0.0568542	0.573287	2.17346		0.228788	0.577243	2.0141			5.25	0.00155855	0.0314826	0.0605339		0.00690144	0.0316709	0.0561401
5.75	0.0559766	0.546385	2.17718		0.170899	0.54225	2.08108			5.75	0.00153128	0.030202	0.0606364		0.00510252	0.0300052	0.0579868
6.25	0.0544229	0.527881	2.17317		0.120374	0.506064	2.11731			6.25	0.001483	0.0293212	0.0605259		0.00353245	0.0282827	0.0589857
6.75	0.0565112	0.522669	2.20953		0.0893393	0.487194	2.15161			6.75	0.00154789	0.0290732	0.0615284		0.00256803	0.0273845	0.0599314
7.25	0.0576118	0.513425	2.21936		0.0816285	0.477778	2.15202			7.25	0.0015821	0.0286332	0.0617994		0.00232842	0.0269363	0.0599428
7.75					0.076926	0.451309	2.18679			7.75					0.00218229	0.0256763	0.0609013
8.25					0.0761733	0.427962	2.17038			8.25					0.0021589	0.024565	0.0604489
8.75					0.0783	0.405412	2.17165			8.75					0.00222498	0.0234916	0.060484
9.25
9.75
10.25
10.75
11.25
11.75
12.25
12.75
13.25
13.75
14.25
14.75
				Std Conditions w/o KBr						VTNA						0.05M KBr						VTNA
				Time	Bpin std	Bromide std	Product std	KBr std	[BPin] std	Norm Time KBr std	[Bromide] std	Norm Time Bromide std	[Pdt] std	Norm Time Pdt std		Time	Bpin	Bromide	Product	KBr	[Bpin ]	Norm Time KBr	[Bromide]	[Bromide] Adj	Norm Time Bromide	[Pdt]
				0	0.0690703	0.108251	0.00100769	0	0.0690703	0	0.108251	0	0.00100769	0		0	0.0688823	0.10793	0.00218102	0.05	0.0688823	0	0.10793	0.10793	0	0.00218102
				0.25	0.0495842	0.0898754	0.0204707	0.0183757	0.0495842	6.66331	0.0898754	1.26125	0.0204707	5.97392		0.25	0.0665104	0.101172	0.00328916	0.0643089	0.0665104	1.85355	0.101172	0.101172	1.52222	0.00328916
				0.5	0.0361765	0.0722847	0.0320047	0.0359664	0.0361765	9.78267	0.0722847	2.71236	0.0320047	9.17055		0.5	0.0623093	0.0933682	0.00872572	0.072113	0.0623093	3.49128	0.0933682	0.0933682	3.13493	0.00872572
ORDER IN KBR		-0.7		0.75	0.0277622	0.0642978	0.0395988	0.0439533	0.0277622	12.1639	0.0642978	4.34874	0.0395988	11.7422		0.75	0.0546167	0.0845243	0.0146646	0.0809569	0.0546167	5.00219	0.0845243	0.0845243	4.86729	0.0146646
				1	0.0219194	0.0562317	0.0450337	0.0520194	0.0219194	14.2588	0.0562317	6.1348	0.0450337	14.0298		1	0.0489704	0.0781416	0.0198737	0.0873397	0.0489704	6.41605	0.0781416	0.0781416	6.7282	0.0198737
				1.25	0.0166686	0.0516712	0.0486107	0.0565799	0.0166686	16.18	0.0516712	8.06471	0.0486107	16.161		1.25	0.0441653	0.0720431	0.0246024	0.0934381	0.0441653	7.76086	0.0720431	0.0720431	8.71185	0.0246024
				1.5	0.0132135	0.0471937	0.0509721	0.0610574	0.0132135	17.9967	0.0471937	10.1165	0.0509721	18.2024		1.5	0.0404723	0.0676575	0.0288252	0.0978237	0.0404723	9.05363	0.0676575	0.0676575	10.8137	0.0288252
				1.75	0.0100865	0.043023	0.0542157	0.065228	0.0100865	19.7254	0.043023	12.3041	0.0542157	20.1671		1.75	0.036007	0.0632621	0.0322319	0.102219	0.036007	10.3064	0.0632621	0.0632621	13.0276	0.0322319
				2	0.00786926	0.0413751	0.0552637	0.066876	0.00786926	21.4004	0.0413751	14.5961	0.0552637	22.0775		2	0.0321117	0.059773	0.0348679	0.105708	0.0321117	11.5257	0.059773	0.059773	15.3543	0.0348679
				2.25	0.00607319	0.0389529	0.0563463	0.0692982	0.00607319	23.0402	0.0389529	16.9689	0.0563463	23.9623		2.25	0.0288871	0.0562639	0.0379482	0.109217	0.0288871	12.7172	0.0562639	0.0562639	17.7926	0.0379482
				2.5	0.0048444	0.0378927	0.0579972	0.0703583	0.0048444	24.6513	0.0378927	19.4164	0.0579972	25.8155		2.5	0.025512	0.0535368	0.0402583	0.111944	0.025512	13.8849	0.0535368	0.0535368	20.3411	0.0402583
				2.75	0.00387393	0.0354036	0.0577631	0.0728474	0.00387393	26.2343	0.0354036	21.9463	0.0577631	27.6527		2.75	0.0228714	0.0515282	0.0422608	0.113953	0.0228714	15.0355	0.0515282	0.0515282	22.9811	0.0422608
				3	0.00322119	0.0350726	0.05975	0.0731785	0.00322119	27.7959	0.0350726	24.5467	0.05975	29.4707		3	0.0203317	0.0492938	0.0444543	0.116187	0.0203317	16.1712	0.0492938	0.0492938	25.7095	0.0444543
				3.25	0.00273947	0.0335916	0.0591677	0.0746595	0.00273947	29.344	0.0335916	27.1949	0.0591677	31.2737		3.25	0.0183348	0.0466887	0.0466176	0.118792	0.0183348	17.2905	0.0466887	0.0466887	28.5475	0.0466176
				3.5	0.00233462	0.0336715	0.0599135	0.0745795	0.00233462	30.882	0.0336715	29.8815	0.0599135	33.0749		3.5	0.0165356	0.0446952	0.0480038	0.120786	0.0165356	18.3947	0.0446952	0.0446952	31.4992	0.0480038
				3.75	0.00205429	0.0334136	0.0601107	0.0748375	0.00205429	32.4187	0.0334136	32.5732	0.0601107	34.8663		3.75	0.0147627	0.0431766	0.0492434	0.122305	0.0147627	19.4877	0.0431766	0.0431766	34.5449	0.0492434
				4	0.0018411	0.0328593	0.0594521	0.0753917	0.0018411	33.9495	0.0328593	35.2879	0.0594521	36.6624		4	0.0129865	0.0415336	0.0503618	0.123948	0.0129865	20.5709	0.0415336	0.0415336	37.6812	0.0503618
				4.25	0.00171577	0.0320987	0.0609076	0.0761524	0.00171577	35.4711	0.0320987	38.041	0.0609076	38.4502		4.25	0.0115864	0.0392415	0.0515906	0.12624	0.0115864	21.6421	0.0392415	0.0392415	40.9391	0.0515906
				4.5	0.00161523	0.0319121	0.0605998	0.076339	0.00161523	36.986	0.0319121	40.8226	0.0605998	40.2262		4.5	0.0103239	0.0381807	0.0527842	0.127301	0.0103239	22.7034	0.0381807	0.0381807	44.3094	0.0527842
				4.75	0.00158567	0.0315009	0.060715	0.0767502	0.00158567	38.4967	0.0315009	43.6224	0.060715	42.0042		4.75	0.00919472	0.0341733	0.0539841	0.131308	0.00919472	23.7501	0.0341733	0.0341733	47.8673	0.0539841
				5.25	0.00155855	0.0314826	0.0605339	0.0767684	0.00155855	41.5124	0.0314826	49.2488	0.0605339	45.5615		5.25	0.00690144	0.0316709	0.0561401	0.13381	0.00690144	25.8073	0.0316709	0.0316709	55.5406	0.0561401
				5.75	0.00153128	0.030202	0.0606364	0.078049	0.00153128	44.5103	0.030202	54.9579	0.0606364	49.1203		5.75	0.00510252	0.0300052	0.0579868	0.135476	0.00510252	27.8422	0.0300052	0.0300052	63.6259	0.0579868
				6.25	0.001483	0.0293212	0.0605259	0.0789298	0.001483	47.4792	0.0293212	60.8113	0.0605259	52.6794		6.25	0.00353245	0.0282827	0.0589857	0.137198	0.00353245	29.8593	0.0282827	0.0282827	72.0852	0.0589857
				6.75	0.00154789	0.0290732	0.0615284	0.0791779	0.00154789	50.4333	0.0290732	66.7438	0.0615284	56.2202		6.75	0.00256803	0.0273845	0.0599314	0.138097	0.00256803	31.863	0.0273845	0.0273845	80.8615	0.0599314
				7.25	0.0015821	0.0286332	0.0617994	0.0796179	0.0015821	53.3784	0.0286332	72.7256	0.0617994	59.7354		7.25	0.00232842	0.0269363	0.0599428	0.138545	0.00232842	33.8599	0.0269363	0.0269363	89.8115	0.0599428
																7.75	0.00218229	0.0256763	0.0609013	0.139805	0.00218229	35.8482	0.0256763	0.0256763	98.9932	0.0609013
																8.25	0.0021589	0.024565	0.0604489	0.140916	0.0021589	37.8247	0.024565	0.024565	108.52	0.0604489
																8.75	0.00222498	0.0234916	0.060484	0.14199	0.00222498	39.7905	0.0234916	0.0234916	118.392	0.060484

## Sheet: same excess reactions
												Same excess reactions
	iCLC Raw Data (peak area)																		Concentration
	std (w/o additive)				same excess				same excess + KBr				same excess + KBr + Product						std (w/o additive)				same excess				same excess + KBr				same excess + KBr + Product
time	Phenyl BPin	benzyl bromide	Product		BPin	Benzyl bromide	product		BPin	Benzyl bromide	Product		BPin	Benzyl bromide	product			time	Phenyl BPin	benzyl bromide	Product		BPin	Benzyl bromide	product		BPin	Benzyl bromide	product		BPin	Benzyl bromide	product
0	2.22938	2.04604	0.0144489				0				0.0159985							0	0.0690703	0.101587	0.00100769				0.000609319				0.00105041
0.25	1.60232	1.8	0.720373				0.0187248				0.0150359							0.25	0.0495842	0.0898754	0.0204707				0.00112558				0.00102387
0.5	1.17086	1.43046	1.13871				0.518369				0.111937							0.5	0.0361765	0.0722847	0.0320047				0.0149013				0.00369552
0.75	0.900086	1.26267	1.41415				0.722041				0.217111							0.75	0.0277622	0.0642978	0.0395988				0.0205167				0.00659529
1	0.712068	1.09321	1.61127		0.799589	1.10965	0.74748		0.741531	1.12293	0.306535		0.885061	1.14861	1.5575			1	0.0219194	0.0562317	0.0450337		0.0246392	0.0570139	0.0212181		0.022835	0.0576463	0.0090608		0.0272953	0.0588686	0.0435511
1.25	0.543095	0.997409	1.74101		0.258081	0.675371	0.762059		0.6837	1.02901	0.379508		0.772819	1.02086	1.59402			1.25	0.0166686	0.0516712	0.0486107		0.0078117	0.0363419	0.0216201		0.0210379	0.0531753	0.0110727		0.0238073	0.0527875	0.044558
1.5	0.43191	0.903344	1.82666		0.0599246	0.530791			0.553789	0.929279	0.442979		0.585159	0.920179	1.72611			1.5	0.0132135	0.0471937	0.0509721		0.00165397	0.0294598			0.0170009	0.0484282	0.0128227		0.0179757	0.047995	0.0481999
1.75	0.331284	0.815728	1.9443		0.0275909	0.510035			0.447001	0.84985	0.498535		0.455924	0.832399	1.83626			1.75	0.0100865	0.043023	0.0542157		0.000649189	0.0284718			0.0136824	0.0446473	0.0143544		0.0139597	0.0438166	0.0512369
2	0.259933	0.781108	1.98231		0.0218487	0.497336			0.356236	0.783637	0.548554		0.348902	0.762389	1.92459			2	0.00786926	0.0413751	0.0552637		0.000470749	0.0278673			0.0108619	0.0414955	0.0157335		0.010634	0.0404841	0.0536722
2.25	0.202135	0.730222	2.02158						0.29129	0.72558	0.593623		0.260358	0.697677	1.99981			2.25	0.00607319	0.0389529	0.0563463						0.00884369	0.0387319	0.0169761		0.00788248	0.0374037	0.0557461
2.5	0.162593	0.707951	2.08146						0.231513	0.676764	0.629132		0.187839	0.672025	2.06345			2.5	0.0048444	0.0378927	0.0579972						0.0069861	0.0364082	0.0179551		0.00562895	0.0361827	0.0575007
2.75	0.131363	0.65566	2.07297						0.175817	0.633025			0.13252	0.623526	2.11104			2.75	0.00387393	0.0354036	0.0577631						0.00525534	0.0343262			0.00390987	0.0338741	0.0588128
3	0.110358	0.648705	2.14503						0.131449	0.5931			0.0807619	0.583098	2.15612			3	0.00322119	0.0350726	0.05975						0.0038766	0.0324257			0.00230149	0.0319496	0.0600556
3.25	0.0948561	0.617591	2.12391						0.0860317	0.558189			0.050976	0.566209	2.17547			3.25	0.00273947	0.0335916	0.0591677						0.00246525	0.030764			0.00137589	0.0311457	0.0605891
3.5	0.081828	0.619272	2.15096						0.0503672	0.525332			0.0309266	0.557462	2.1956			3.5	0.00233462	0.0336715	0.0599135						0.00135697	0.0291999			0.000752847	0.0307294	0.0611441
3.75	0.0728072	0.613852	2.15812												2.20466			3.75	0.00205429	0.0334136	0.0601107
4	0.0659466	0.602209	2.13423															4	0.0018411	0.0328593	0.0594521
4.25	0.0619136	0.586229	2.18702															4.25	0.00171577	0.0320987	0.0609076
4.5	0.0586781	0.58231	2.17585															4.5	0.00161523	0.0319121	0.0605998
4.75	0.0577268	0.573671	2.18003															4.75	0.00158567	0.0315009	0.060715
5.25	0.0568542	0.573287	2.17346															5.25	0.00155855	0.0314826	0.0605339
5.75	0.0559766	0.546385	2.17718															5.75	0.00153128	0.030202	0.0606364
6.25	0.0544229	0.527881	2.17317															6.25	0.001483	0.0293212	0.0605259
6.75	0.0565112	0.522669	2.20953															6.75	0.00154789	0.0290732	0.0615284
7.25	0.0576118	0.513425	2.21936															7.25	0.0015821	0.0286332	0.0617994
7.75
8.25
8.75
9.25
9.75
10.25
10.75
11.25
11.75
12.25
12.75

## Sheet: Halide Inhibition
												Halide inhibition
	iCLC Raw Data (peak area)																		Concentration
	std (w/o additive)				1 equiv. KBr				1 equiv. KCl				1 equiv. KI						std (w/o additive)				1 equiv. KBr				1 equiv. KCl				1 equiv. KI
time	Phenyl BPin	benzyl bromide	Product		BPin	Benzyl bromide	product		BPin	Benzyl bromide	Product		BPin	Benzyl bromide	product	benzyl Iodide		time	Phenyl BPin	benzyl bromide	Product		BPin	Benzyl bromide	product		BPin	Benzyl bromide	product		BPin	Benzyl bromide	product	Benzyl Iodide
0	2.22938	2.18604	0.0144489		2.22632	2.17547	0.0160385		2.29823	2.42245	0.0546437		2.0352	2.06025	0.0195546	0.000861966		0	0.0690703	0.108251	0.00100769		0.068975	0.107748	0.00105152		0.0712097	0.119504	0.0021159		0.0630361	0.102263	0.00114846	0.0146681
0.25	1.60232	1.8	0.720373		2.00431	2.01594	0.0457933		1.80844	2.0142	0.463021		1.98229	1.96111	0.00796751	0.0823073		0.25	0.0495842	0.0898754	0.0204707		0.062076	0.100154	0.00187189		0.0559895	0.100072	0.0133753		0.061392	0.0975441	0.000828991	0.0180518
0.5	1.17086	1.43046	1.13871		1.82216	1.88629	0.244846		1.46549	1.76236	0.778954		1.85716	1.63684	0.0167247	0.438095		0.5	0.0361765	0.0722847	0.0320047		0.0564158	0.0939827	0.00735996		0.0453322	0.0880835	0.0220859		0.0575035	0.0821088	0.00107044	0.0328332
0.75	0.900086	1.26267	1.41415		1.70106	1.80782	0.415143		1.2299	1.57474	1.01036		1.8171	1.16578	0.0369275	1.01739		0.75	0.0277622	0.0642978	0.0395988		0.0526526	0.0902476	0.0120552		0.0380111	0.0791529	0.0284659		0.0562586	0.059686	0.00162745	0.0569001
1	0.712068	1.09321	1.61127		1.59608	1.73446	0.552955		1.06054	1.42461	1.19077		1.77361	0.675471	0.0639042	1.43467		1	0.0219194	0.0562317	0.0450337		0.0493902	0.0867555	0.0158548		0.0327483	0.0720066	0.03344		0.0549072	0.0363467	0.00237122	0.0742363
1.25	0.543095	0.997409	1.74101		1.49059	1.66597	0.67008		0.91717	1.28807	1.34286		1.72008	0.398555	0.098492	1.58472		1.25	0.0166686	0.0516712	0.0486107		0.0461123	0.0834955	0.0190841		0.028293	0.0655067	0.0376334		0.0532437	0.0231652	0.00332484	0.0804701
1.5	0.43191	0.903344	1.82666		1.38835	1.58365	0.776812		0.787871	1.20132	1.46432		1.66867	0.29087	0.132983	1.61049		1.5	0.0132135	0.0471937	0.0509721		0.0429351	0.0795767	0.0220268		0.024275	0.0613776	0.040982		0.051646	0.0180393	0.00427579	0.0815407
1.75	0.331284	0.815728	1.9443		1.29797	1.51371	0.875151		0.670667	1.10968	1.56535		1.60735	0.244189	0.165259	1.58682		1.75	0.0100865	0.043023	0.0542157		0.0401264	0.0762478	0.0247381		0.0206329	0.0570154	0.0437675		0.0497404	0.0158173	0.00516567	0.0805576
2	0.259933	0.781108	1.98231		1.21455	1.45593	0.958942		0.579764	1.03081	1.67299		1.56388	0.217548	0.19268	1.56715		2	0.00786926	0.0413751	0.0552637		0.0375342	0.0734973	0.0270483		0.0178081	0.053261	0.0467354		0.0483896	0.0145491	0.0059217	0.0797405
2.25	0.202135	0.730222	2.02158		1.1386	1.40441	1.03902		0.498036	0.964681	1.75138		1.52249	0.197306	0.217475	1.54391		2.25	0.00607319	0.0389529	0.0563463		0.0351741	0.0710447	0.0292561		0.0152684	0.0501134	0.0488965		0.0471035	0.0135856	0.00660533	0.0787748
2.5	0.162593	0.707951	2.08146		1.08143	1.34884	1.12306		0.432211	0.895838	1.83689		1.4907	0.179867	0.239414	1.51761		2.5	0.0048444	0.0378927	0.0579972		0.0333974	0.0683995	0.0315733		0.0132228	0.0468363	0.0512543		0.0461155	0.0127555	0.00721019	0.0776824
2.75	0.131363	0.65566	2.07297		1.00795	1.28972	1.18332		0.369368	0.842495	1.883		1.46686	0.166716	0.259558	1.50156		2.75	0.00387393	0.0354036	0.0577631		0.0311141	0.0655855	0.0332347		0.01127	0.0442972	0.0525255		0.0453747	0.0121295	0.0077656	0.0770156
3	0.110358	0.648705	2.14503		0.945394	1.23597	1.25139		0.313691	0.803858	1.92674		1.42286	0.15487	0.278953	1.46978		3	0.00322119	0.0350726	0.05975		0.0291701	0.0630271	0.0351114		0.0095398	0.042458	0.0537314		0.0440075	0.0115656	0.00830033	0.0756952
3.25	0.0948561	0.617591	2.12391		0.874676	1.19039	1.30375		0.262152	0.756435	1.98921		1.38547	0.145989	0.298813	1.44311		3.25	0.00273947	0.0335916	0.0591677		0.0269725	0.0608574	0.0365549		0.00793823	0.0402006	0.0554537		0.0428457	0.0111429	0.0088479	0.0745869
3.5	0.081828	0.619272	2.15096		0.816041	1.14262	1.36673		0.213738	0.712747	2.03303		1.3656	0.13639	0.313681	1.42465		3.5	0.00233462	0.0336715	0.0599135		0.0251504	0.0585834	0.0382916		0.00643375	0.0381211	0.0566619		0.0422282	0.0106859	0.00925783	0.0738202
3.75	0.0728072	0.613852	2.15812		0.755331	1.09334	1.41689		0.181924	0.671602	2.09588		1.34802	0.128583	0.330292	1.39998		3.75	0.00205429	0.0334136	0.0601107		0.0232639	0.0562377	0.0396744		0.00544513	0.0361625	0.0583949		0.0416819	0.0103143	0.00971578	0.0727953
4	0.0659466	0.602209	2.13423		0.700487	1.05152	1.46102		0.136433	0.636924	2.10773		1.31712	0.120834	0.344595	1.3741		4	0.0018411	0.0328593	0.0594521		0.0215596	0.0542469	0.0408912		0.00403147	0.0345118	0.0587216		0.0407215	0.00994544	0.0101101	0.07172
4.25	0.0619136	0.586229	2.18702		0.645595	1.00211	1.51653		0.101876	0.614749	2.12555		1.28574	0.116675	0.361161	1.3556		4.25	0.00171577	0.0320987	0.0609076		0.0198538	0.0518949	0.0424215		0.00295763	0.0334563	0.0592128		0.0397463	0.00974748	0.0105669	0.0709514
4.5	0.0586781	0.58231	2.17585		0.591448	0.965941	1.54639		0.0794215	0.585845	2.15171		1.26224	0.109942	0.373976	1.33617		4.5	0.00161523	0.0319121	0.0605998		0.0181711	0.0501733	0.0432449		0.00225984	0.0320804	0.0599341		0.039016	0.00942696	0.0109202	0.0701443
4.75	0.0577268	0.573671	2.18003		0.543794	0.925581	1.60231		0.0646903	0.571072	2.18382		1.24318	0.105017	0.387831	1.31528		4.75	0.00158567	0.0315009	0.060715		0.0166903	0.0482521	0.0447866		0.00180206	0.0313772	0.0608193		0.0384239	0.00919256	0.0113022	0.0692763
5.25	0.0568542	0.573287	2.17346		0.449913	0.848031	1.6901		0.0558679	0.555211	2.18552		1.20144	0.0972301	0.413797	1.27108		5.25	0.00155855	0.0314826	0.0605339		0.0137729	0.0445607	0.047207						0.0371267	0.00882188	0.0120181	0.0674399
5.75	0.0559766	0.546385	2.17718		0.370564	0.783592	1.74873						1.16656	0.0899401	0.436024	1.23169		5.75	0.00153128	0.030202	0.0606364		0.0113071	0.0414933	0.0488235						0.0360428	0.00847487	0.0126309	0.0658037
6.25	0.0544229	0.527881	2.17317		0.297595	0.717445	1.81911						1.12706	0.0826018	0.45419	1.1981		6.25	0.001483	0.0293212	0.0605259		0.00903961	0.0383447	0.050764						0.0348153	0.00812556	0.0131318	0.064408
6.75	0.0565112	0.522669	2.20953		0.237817	0.648561	1.90024											6.75	0.00154789	0.0290732	0.0615284		0.00718201	0.0350657	0.0530007
7.25	0.0576118	0.513425	2.21936		0.17809	0.615261	1.91014											7.25	0.0015821	0.0286332	0.0617994		0.00532599	0.0334806	0.0532737
7.75					0.138462	0.561005	1.91084											7.75					0.00409452	0.030898	0.053293
8.25					0.106844	0.554885	1.91471											8.25					0.00311199	0.0306067	0.0533997
8.75					0.0868848	0.522099	1.95254											8.75					0.00249176	0.029046	0.0544427
9.25					0.0780884	0.506685	1.989											9.25					0.00221841	0.0283123	0.0554481
9.75					0.0735146	0.486447	1.98918											9.75					0.00207628	0.027349	0.0554531
10.25					0.0769413	0.483546	1.98928											10.25					0.00218276	0.0272109	0.0554559
10.75					0.0746686	0.481842	1.98956											10.75					0.00211214	0.0271298	0.0554635
11.25					0.0757918	0.468443	1.98978											11.25					0.00214704	0.0264919	0.0554696
11.75					0.075236	0.462226	1.98963											11.75					0.00212977	0.026196	0.0554653
12.25					0.0734627	0.449247	1.99158											12.25					0.00207466	0.0255782	0.0555192
12.75					0.074124	0.439239	1.99314											12.75					0.00209521	0.0251018	0.0555621

## Sheet: BnBr vs BnCl
								BnCl vs BnBr
	iCLC Raw Data (peak area)											Concentration
	Std (Benzyl Bromide)				Benzyl Chloride						Std (Benzyl Bromide)				Benzyl Chloride
time	Phenyl BPin	benzyl bromide	Product		BPin	Benzyl Chloride	product			time	Phenyl BPin	benzyl bromide	Product		BPin	Benzyl chloride	product
0	2.22938	2.03604	0.0144489		2.19699	0.742423	0.0980117			0	0.0690703	0.101111	0.00100769		0.0680636	0.0993127	0.0033116
0.25	1.60232	1.8	0.720373		0.723098	0.384951	1.66574			0.25	0.0495842	0.0898754	0.0204707		0.0222622	0.0527548	0.0465355
0.5	1.17086	1.43046	1.13871		0.154699	0.245618	2.28908			0.5	0.0361765	0.0722847	0.0320047		0.00459911	0.0346077	0.0637215
0.75	0.900086	1.26267	1.41415		0.035774	0.209589	2.3413			0.75	0.0277622	0.0642978	0.0395988		0.00090348	0.0299152	0.0651612
1	0.712068	1.09321	1.61127		0.0149411	0.205481	2.34058			1	0.0219194	0.0562317	0.0450337		0.000256093	0.0293802	0.0651415
1.25	0.543095	0.997409	1.74101		0.011116	0.200911	2.34019			1.25	0.0166686	0.0516712	0.0486107		0.000137227	0.0287849	0.0651308
1.5	0.43191	0.903344	1.82666		0.00857803	0.198457	2.34058			1.5	0.0132135	0.0471937	0.0509721		5.83601e-05	0.0284654	0.0651414
1.75	0.331284	0.815728	1.9443		0.00920406	0.196586	2.34058			1.75	0.0100865	0.043023	0.0542157		7.78143e-05	0.0282217	0.0651414
2	0.259933	0.781108	1.98231		0.00850902	0.195304	2.34061			2	0.00786926	0.0413751	0.0552637		5.62157e-05	0.0280547	0.0651423
2.25	0.202135	0.730222	2.02158							2.25	0.00607319	0.0389529	0.0563463
2.5	0.162593	0.707951	2.08146							2.5	0.0048444	0.0378927	0.0579972
2.75	0.131363	0.65566	2.07297							2.75	0.00387393	0.0354036	0.0577631
3	0.110358	0.648705	2.14503							3	0.00322119	0.0350726	0.05975
3.25	0.0948561	0.617591	2.12391							3.25	0.00273947	0.0335916	0.0591677
3.5	0.081828	0.619272	2.15096							3.5	0.00233462	0.0336715	0.0599135
3.75	0.0728072	0.613852	2.15812							3.75	0.00205429	0.0334136	0.0601107
4	0.0659466	0.602209	2.13423							4	0.0018411	0.0328593	0.0594521
4.25	0.0619136	0.586229	2.18702							4.25	0.00171577	0.0320987	0.0609076
4.5	0.0586781	0.58231	2.17585							4.5	0.00161523	0.0319121	0.0605998
4.75	0.0577268	0.573671	2.18003							4.75	0.00158567	0.0315009	0.060715
5.25	0.0568542	0.573287	2.17346							5.25	0.00155855	0.0314826	0.0605339
5.75	0.0559766	0.546385	2.17718							5.75	0.00153128	0.030202	0.0606364
6.25	0.0544229	0.527881	2.17317							6.25	0.001483	0.0293212	0.0605259
6.75	0.0565112	0.522669	2.20953							6.75	0.00154789	0.0290732	0.0615284
7.25	0.0576118	0.513425	2.21936							7.25	0.0015821	0.0286332	0.0617994

[truncated: 16 more sheets: competition reaction , TBAB-Cl-I, different boronic esterss, Dif excess-Water (total  10ml), Dif excess water(7ml MeTHF), Carbazole inhibition., background rxn, hydrolysis of BPin, hyrolysis with TBA salts, Different excess in BnBr(TBAB), Different excess in Bpin (TBAB), different excess in cat (TBAB), different excess in base (TBAB), TBAB acceleration impact, Sp2-Sp2 coupling system, TBATf vs TBAB vs KBr vs KTf]
